## **Microtubules control cellular shape and coherence in amoeboid migrating cells**

Aglaja Kopf<sup>1</sup>, Jörg Renkawitz<sup>1,2</sup>, Robert Hauschild<sup>1</sup>, Irute Girkontaite<sup>3</sup>, Kerry Tedford<sup>4</sup>, Jack Merrin<sup>1</sup>, Oliver Thorn-Seshold<sup>5</sup>, Dirk Trauner<sup>6</sup>, Hans Häcker<sup>7</sup>, Klaus-Dieter Fischer<sup>4</sup>, Eva Kiermaier<sup>1,8,\*</sup> and Michael Sixt<sup>1,\*</sup>

<sup>1</sup>Institute of Science and Technology (IST) Austria, 3400 Klosterneuburg, Austria.

<sup>2</sup>Biomedical Center (BMC), Walter Brendel Center of Experimental Medicine, Institute of Cardiovascular Physiology and Pathophysiology, Klinikum der Universität, LMU Munich, 81377 Munich, Germany.

<sup>3</sup>Department of Immunology, State Research Institute Centre for Innovative Medicine, LT-08409 Vilnius, Lithuania.

<sup>4</sup>Institute of Biochemistry and Cell Biology, Otto-von-Guericke University, 39120 Magdeburg, Germany.

<sup>5</sup>Department of Pharmacy, Ludwig-Maximilians-University Munich, 81377 Munich, Germany.

<sup>6</sup>Department of Chemistry, New York University, New York, NY 10003, USA.

<sup>7</sup>Department of Infectious Diseases, St. Jude Children's Research Hospital, Memphis, TN 38105, USA.

<sup>8</sup>Life and Medical Science (LIMES) Institute, University of Bonn, 53113 Bonn, Germany.

\*Correspondence to Michael Sixt; [Sixt@ist.ac.at](mailto:Sixt@ist.ac.at), phone +43 2243 90003801 or Eva Kiermaier [ekiermai@uni-bonn.de](mailto:ekiermai@uni-bonn.de), phone +49 228-73-62819

1 **Cells navigating through tissues face a fundamental challenge: while multiple cellular**  
2 **protrusions explore different paths through the complex geometry of an interstitial matrix**  
3 **the cell needs to avoid becoming too long or ramified, which might ultimately lead to a loss**  
4 **of physical coherence. How a cell surveys its own shape to inform the actomyosin system**  
5 **to retract entangled or stretched protrusions is not understood. Here, we demonstrate that**  
6 **spatially distinct microtubule (MT) dynamics regulate amoeboid cell migration by locally**  
7 **specifying the retraction of explorative protrusions. In migrating dendritic cells (DCs), the**  
8 **microtubule organizing center (MTOC) guides the path through a three dimensional (3D)**  
9 **interstitium and local MT depolymerization in protrusions remote from the MTOC triggers**  
10 **myosin II dependent contractility via the RhoA exchange factor Lfc. Depletion of Lfc leads**  
11 **to aberrant myosin localization, thereby causing two effects that rate-limit locomotion: i)**  
12 **impaired cell edge coordination during path-finding and ii) defective adhesion-resolution.**  
13 **Such compromised cell shape control is particularly hindering when cells navigate through**  
14 **geometrically complex microenvironments, where it leads to entanglement and ultimately**  
15 **fragmentation of the cell body. Our data demonstrate that MTs control cell shape and**  
16 **coherence by locally controlling protrusion-retraction dynamics of the actomyosin system.**

17

18

19 How different cell types maintain their typical shape and how cells with a dynamic shape  
20 prevent loss of physical coherence is poorly understood. This issue becomes particularly  
21 critical in migrating cells, in which protrusion of the leading edge has to be balanced by  
22 retraction of the tail<sup>1,2</sup> and where multiple protrusions of one cell often compete for  
23 dominance, as exemplified in the split pseudopod model of chemotactic migration<sup>3</sup>. The two  
24 prevalent models of how remote edges of mammalian cells communicate with each other are  
25 based on the sensing of endogenous mechanical parameters that in turn control the  
26 actomyosin system. In cell types that tightly adhere to substrates via focal adhesion  
27 complexes it has been proposed that actomyosin itself is the sensing structure and that  
28 adhesion sites communicate mechanically via actin stress fibers: when contractile stress  
29 fibers were pharmacologically, physically or genetically perturbed in mesenchymal cells, the  
30 cells lost their coherent shape and spread in an uncontrolled manner<sup>4,5</sup>. While  
31 communication via stress fibers is useful for adherent cells, it is unlikely to control the shape  
32 of amoeboid cells, which are often loosely or non-adherent and accordingly do not assemble  
33 stress fibers<sup>6,7</sup>. A second model suggests that lateral plasma membrane tension, which is  
34 thought to rapidly equilibrate across the cell surface, mediates communication between  
35 competing protrusions and serves as an input system to control actomyosin dynamics<sup>8-11</sup>.  
36 However, many amoeboid cells (such as DCs) are large and ramified<sup>12</sup> and particularly when  
37 they are tightly embedded in 3D matrices it is questionable whether lateral membrane

38 tension is able to equilibrate across the cell body<sup>13</sup>. Any alternative “internal shape sensor”  
39 would need to operate across the cellular scale and mediate communication between cell  
40 edges often more than hundred micrometers apart. Centrally nucleated MTs seem ideally  
41 suited for this task. We recently found that when leukocytes migrate through complex  
42 geometries, their nucleus acts as a mechanical gauge to lead them along the path of least  
43 resistance<sup>14</sup>. By spatial association with the nucleus, the MTOC and its nucleated MTs were  
44 involved in this navigational task, demonstrating that the positioning of the MTOC relative to  
45 the nucleus is critical for amoeboid navigation.

46 As cytoskeletal dynamics are notoriously difficult to visualize *in situ* or in physiological  
47 environments like collagen gels we used microfluidic pillar mazes<sup>15</sup> as a reductionist setup  
48 that mimics some of the geometrical complexities of interstitial matrices while being  
49 accessible to imaging (Supplementary Fig. 1a-c). Within these devices cells are confined  
50 between two adjacent surfaces intersected by pillars of variable spacing and exposed to  
51 soluble gradients of the chemokine CCL19. CCL19 polarizes and directionally guides DCs and  
52 within the organism this leads them via lymphatic vessels towards the center of the draining  
53 lymph node<sup>16</sup>. To track MT plus ends we generated precursor cell lines stably expressing end  
54 binding protein 3 fused to mCherry (EB3-mCherry) and differentiated them into DCs. During  
55 time lapse imaging the MTOC appeared as the brightest spot radiating MT plus ends,  
56 indicating that MTs nucleate almost exclusively at the MTOC which is mainly located behind  
57 the nucleus (Fig. 1a, Supplementary Fig. 1d-f). When cells navigated through the pillar maze,  
58 the MTOC moved in a remarkably straight line up the chemokine gradient although transient  
59 lateral protrusions regularly explored alternative paths between the pillars (Fig. 1b). Notably,  
60 MT plus ends vanished from lateral protrusions that later became retracted (Supplementary  
61 Movie 1). To capture MT dynamics more quantitatively we imaged DCs migrating along  
62 chemokine gradients when confined under a pad of agarose<sup>17</sup> where the flattened  
63 morphology allows faithful tracing of fluorescent signal (Supplementary Figure 1a, d). Here,  
64 cells migrate persistently and are stably segregated into a protruding leading edge and a  
65 retracting trailing edge (Fig. 1c). Visualization of the MT binding domain of ensconsin (EMTB)  
66 revealed long lived MTs at the leading lamellipodium while MT dynamics were increased at  
67 the trailing edge, exhibiting higher frequencies of shrinkage events compared to front  
68 directed filaments (Fig. 1d, Supplementary Fig. 1g and Supplementary Movie 2). These  
69 observations demonstrate that MT depolymerization is associated with cellular retraction.

70 To test for a causal relationship between MT depolymerization and retraction we devised a  
71 photo-pharmacological approach to depolymerize MTs in migratory cells with spatiotemporal  
72 control. We used Photostatin-1 (PST-1), a reversibly photo-switchable analogue of  
73 combretastatin A-4, which can be functionally toggled between the active and inactive state  
74 by blue and green light, respectively<sup>18</sup>. To validate the approach, we locally activated the drug  
75 under simultaneous visualization of MT plus ends using EB3-mCherry. We found that local  
76 photo-activation triggered almost instantaneous disappearance of the EB3 signal in the  
77 presence but not in the absence of Photostatin (Supplementary Fig. 1h), indicating rapid  
78 stalling of MT polymerization. Local depolymerization in protruding areas of the cell led to  
79 consistent collapse of the illuminated protrusion and subsequent re-polarisation of the cell  
80 (Fig. 1e, Supplementary Movie 3). This response was only observed in the presence of  
81 Photostatin, while in the absence of the drug cells were refractory to illumination. These data  
82 demonstrate a causal relationship between MT depolymerization and cellular retraction. This  
83 effect can act locally within a cell, raising the possibility that MTs coordinate subcellular  
84 retractions when navigating through geometrically complex environments such as collagen  
85 gels or a physiological interstitium.

86 To directly address the impact of the MT cytoskeleton on the coordination of competing  
87 protrusions, we used a microfluidic setup in which DCs migrate in a straight channel towards  
88 a junction where the channel splits into four paths. In this setup DCs initially insert protrusions  
89 into all four channels before they retract all but one protrusion and thereby select one path  
90 along which they advance (Figure 2a, Supplementary Figure 1a). Global depletion of MTs  
91 using nocodazole (Supplementary Fig. 2a) led to uncoordinated protrusion dynamics and  
92 resulted in cell entanglement due to defective retraction of lateral protrusions (Figure 2b).  
93 Frequently, cells lost cytoplasmic coherence when competing protrusions continued to  
94 migrate up the chemokine gradient until the cell ruptured (Figure 2c, Supplementary Movie  
95 4). Similarly, cells migrating *in situ* failed to reach lymphatic vessels (Supplementary Fig. 2b)  
96 and cells migrating in collagen gels lost cytoplasmic coherence and fragmented upon  
97 nocodazole treatment (Supplementary Fig. 2c, Supplementary Movie 5). In contrast to  
98 complex environments such as bifurcating channels and collagen gels, MT depolymerization  
99 did not affect cell coherence and general migratory capacity in linear microfluidic channels.

100 In such geometrically simple environments where uniaxial polarity is externally enforced and  
101 where there is no competition of multiple protrusions, nocodazole merely caused cells to

102 switch direction more frequently than untreated cells (Fig. 2d, e, Supplementary Movie 6,  
103 Supplementary Fig. 2d-g).

104 As demonstrated in other cell types, nocodazole treatment triggered a global increase of  
105 RhoA activity and myosin light chain (MLC) phosphorylation<sup>19,20</sup> (Supplementary Fig. 2h, i) and  
106 pharmacological inhibition of the effector kinase Rho-associated protein kinase (ROCK) by  
107 Y27632 reverted this effect. Accordingly, in linear channels nocodazole-induced directional  
108 switching was reverted by additional ROCK inhibition (Fig. 2f-h, Supplementary Movie 6),  
109 indicating that an important function of MTs is to both control the activity and to stabilize the  
110 localization of the cell's contractile module. As expected, ROCK inhibition failed to rescue cell  
111 integrity and locomotion after MT depletion in complex environments (Figure 2i-l,  
112 Supplementary Movie 5). Here, contractility is rate limiting for locomotion and ROCK  
113 inhibition alone caused the cells to entangle (Fig. 2m). Together our data add evidence that  
114 MTs act upstream of the contractile module and that actomyosin contractility is locally  
115 coordinated by MT depolymerisation, which effectively coordinates competing protrusions  
116 when cells migrate through complex environments.

117 One established molecular link between MT depolymerization and actomyosin contraction is  
118 the MT-regulated RhoA guanine nucleotide exchange factor (GEF) Lfc, the murine homologue  
119 of GEF-H1<sup>21</sup>. When Lfc is sequestered to MTs it is locked in its inactive state and only upon  
120 release from MTs it is targeted to membrane associated sites where it becomes active and  
121 triggers actomyosin contraction<sup>22,23</sup>. To test whether Lfc is involved in coordinating  
122 protrusions we knocked out *Arhgef2*, the Lfc encoding gene in mice (Supplementary Fig. 3a-  
123 f) and placed mature DCs into bifurcating microfluidic channels (Fig. 3a, b, Supplementary Fig.  
124 4a). In line with the finding that Lfc mediates between MTs and myosin II (Supplementary Fig.  
125 4b, c, d), *Lfc*<sup>-/-</sup> DCs showed increased passage times due to defective retraction of  
126 supernumerary protrusions (Fig. 3c, d) although showing no differences in MT organization  
127 (Supplementary Fig. 4e-g). Similar to nocodazole-treated cells, *Lfc*<sup>-/-</sup> DCs often advanced  
128 through more than one channel (Fig. 3b), ultimately resulting in auto-fragmentation into  
129 migratory cytoplasts (Fig. 3e, Supplementary Movie 7). When DCs migrated in straight  
130 channels and even when confronted with single constrictions, *Lfc*<sup>-/-</sup> cells passed with the same  
131 speed and efficiency as wildtype cells (Fig. 3f, Supplementary Fig. 4h), demonstrating that  
132 neither locomotion nor passage through constrictions was perturbed but rather the  
133 coordination of competing protrusions. These data indicate that in complex 3D geometries,

134 where the cell has to choose between different paths, MTs - via Lfc and myosin II - specify  
135 entangled protrusions for retraction.

136 To determine how the Lfc pathway affects the contractile module we dynamically visualized  
137 MLC localization in  $Lfc^{-/-}$  and wildtype DCs migrating under agarose towards CCL19 gradients.  
138 While MLC was largely excluded from the leading lamellipodium, two distinct pools were  
139 detectable in the cell body of wildtype cells: one at the trailing edge and one in the cell center,  
140 at the base of the lamellipodium and around the nucleus (Fig. 4a, Supplementary Fig. 5a, b).  
141 Quantification of the distance between center of mass and center of MLC signal showed that  
142 migrating  $Lfc^{-/-}$  cells completely lost MLC polarization at the trailing edge, but maintained MLC  
143 in the cell center (Fig. 4b-d, Supplementary Fig. 5c, d and Supplementary Movie 8). The same  
144 distribution pattern was obtained by determining the localization of the active form of MLC  
145 (phospho-MLC) (Fig. 4e) and its effector protein moesin (Supplementary Fig. 5e, f) in fixed  
146 samples. This demonstrates that Lfc-deficiency leads to mislocalization of the contractile  
147 module and consequently to a loss of myosin II mediated contraction in peripheral  
148 protrusions. To address how this impacts overall locomotion, we next measured the  
149 migratory capacity of  $Lfc^{-/-}$  DCs under physiological conditions. *In situ* migration in explanted  
150 ear sheets showed that  $Lfc^{-/-}$  cells reached the lymphatic vessels later than control cells (Fig.  
151 4f) and chemotaxis of  $Lfc^{-/-}$  DCs in collagen gels was substantially impaired (Fig. 4g,  
152 Supplementary Movie 9). When we measured cell length s in 3D collagen gels,  $Lfc^{-/-}$  DCs were  
153 significantly elongated compared to control cells, indicating retraction defects (Fig. 4h).

154 In cells that employ an amoeboid mode of migration, defective retraction can not only stall  
155 locomotion by entanglement but might also lead to failed disassembly of integrin adhesion  
156 sites. We therefore tested the role of adhesion-resolution in under agarose assays, where,  
157 depending on the surface conditions, DCs can flexibly shift between adhesion-dependent and  
158 adhesion-independent locomotion<sup>24</sup>. Under adhesive conditions  $Lfc^{-/-}$  DCs were elongated  
159 compared to wildtype cells (Fig. 5a) and this elongation was lost when the migratory substrate  
160 at the bottom was passivated with polyethylene glycol (PEG) (Fig. 5b, e). When cells on  
161 adhesive surfaces were treated with nocodazole, wildtype cells shortened, as expected due  
162 to hypercontractility (Fig. 5c). Notably,  $Lfc^{-/-}$  DCs elongated even more upon treatment with  
163 nocodazole (Fig. 5c, lower panel), indicating that elimination of Lfc-mediated  
164 hypercontractility unmasked additional modes of MT-mediated length control. Elongation of  
165  $Lfc^{-/-}$  cells by nocodazole was also largely absent on PEG-coated surfaces (Fig. 5d, f,

166 Supplementary Movie 10). Importantly, not only morphological, but also migratory  
167 parameters were restored on passivated surfaces (Fig. 5g, h). Together, these data  
168 demonstrate that whenever DCs migrate in an adhesion-mediated manner, MTs control de-  
169 adhesion and this is partially mediated via Lfc and myosin II. We conclude that MT  
170 depolymerization in peripheral regions of migrating DCs locally triggers actomyosin-mediated  
171 retraction via the RhoA GEF Lfc. Thereby MTs coordinate protrusion-retraction dynamics and  
172 prevent that the cell gets too long or ramified.

173

174 Although it is likely that multiple feedback loops signal between actin and MTs, we show that  
175 there is a strong causal link between local MT catastrophes and cellular retraction, with MTs  
176 acting upstream. This raises the key question how MT stability is locally regulated in DCs.  
177 Among many possible inputs (adhesion, chemotactic signals etc.) one simple option might be  
178 related to the fact that in leukocytes the MTOC is the only site where substantial nucleation  
179 of MTs occurs. In complex environments (like the pillar maze we devised) the MTOC of a DC  
180 moves a remarkably straight path, while lateral protrusions constantly explore the  
181 environment (Figure 1b). Hence, passage of the MTOC beyond an obstacle is the decisive  
182 event determining the future trajectory of the cell. Upon passage of the MTOC, sheer  
183 geometry might determine that all but the leading protrusion are cut off MT supply because  
184 MTs are too inflexible to find their way into curved, narrow and ramified spaces. Together,  
185 we propose that MTs serve as an internal explorative system of the cell that informs  
186 actomyosin whenever a peripheral protrusion locates too distant from the centroid and  
187 thereby initiates its retraction.

188

189 **Acknowledgments**

190 The authors thank the Scientific Service Units of IST Austria for their excellent services. This  
191 work was supported by the European Research Council (ERC StG 281556 and CoG 724373), a  
192 grant from the Austrian Science Foundation (FWF) and the FWF DK 'Nanocell' to M.S.. J.R was  
193 supported by ISTFELLOW funding from the People Programme (Marie Curie Actions) of the  
194 European Union's Seventh Framework P (FP7/2007-2013) under REA grant agreement n°  
195 [291734] and an EMBO long-term fellowship (ALTF 1396-2014) co-funded by the European  
196 Commission (LTFCOFUND2013, GA-2013-609409). H.H. was supported by the American  
197 Lebanese Syrian Associated Charities (ALSAC).

198

199 **Conflict of interest**

200 The authors declare no competing financial interests.

201

202



203 **References**

- 204 1. Xu, J. *et al.* Divergent signals and cytoskeletal assemblies regulate self-organizing  
205 polarity in neutrophils. *Cell* **114**, 201–214 (2003).
- 206 2. Tsai, T. Y.-C. *et al.* Efficient Front-Rear Coupling in Neutrophil Chemotaxis by Dynamic  
207 Myosin II Localization. *Developmental Cell* **49**, 189–205.e6 (2019).
- 208 3. Insall, R. H. Understanding eukaryotic chemotaxis: a pseudopod-centred view. *Nature*  
209 *Publishing Group* **11**, 453–458 (2010).
- 210 4. Cai, Y. *et al.* Cytoskeletal coherence requires myosin-IIA contractility. *Journal of Cell*  
211 *Science* **123**, 413–423 (2010).
- 212 5. Cai, Y. & Sheetz, M. P. Force propagation across cells: mechanical coherence of  
213 dynamic cytoskeletons. *Current Opinion in Cell Biology* **21**, 47–50 (2009).
- 214 6. Friedl, P. & Wolf, K. Plasticity of cell migration: a multiscale tuning model. *The Journal*  
215 *of Cell Biology* **188**, 11–19 (2010).
- 216 7. Valerius, N. H., Stendahl, O., Hartwig, J. H. & Stossel, T. P. Distribution of actin-binding  
217 protein and myosin in polymorphonuclear leukocytes during locomotion and  
218 phagocytosis. *Cell* **24**, 195–202 (1981).
- 219 8. Diz-Muñoz, A. *et al.* Membrane Tension Acts Through PLD2 and mTORC2 to Limit Actin  
220 Network Assembly During Neutrophil Migration. *PLoS Biol.* **14**, e1002474 (2016).
- 221 9. Houk, A. R. *et al.* Membrane tension maintains cell polarity by confining signals to the  
222 leading edge during neutrophil migration. *Cell* **148**, 175–188 (2012).
- 223 10. Keren, K. *et al.* Mechanism of shape determination in motile cells. *Nature* **453**, 475–U1  
224 (2008).
- 225 11. Murrell, M., Oakes, P. W., Lenz, M. & Gardel, M. L. Forcing cells into shape: the  
226 mechanics of actomyosin contractility. *Nature Publishing Group* **16**, 486–498 (2015).
- 227 12. Friedl, P. & Weigelin, B. Interstitial leukocyte migration and immune function. *Nat*  
228 *Immunol* **9**, 960–969 (2008).
- 229 13. Shi, Z., Graber, Z. T., Baumgart, T., Stone, H. A. & Cohen, A. E. Cell Membranes Resist  
230 Flow. *Cell* (2018). doi:10.1016/j.cell.2018.09.054
- 231 14. Renkawitz, J. *et al.* Nuclear positioning facilitates amoeboid migration along the path  
232 of least resistance. *Nature* 1–29 (2019). doi:10.1038/s41586-019-1087-5
- 233 15. Renkawitz, J., Reversat, A., Leithner, A., Merrin, J. & Sixt, M. Micro-engineered ‘pillar  
234 forests’ to study cell migration in complex but controlled 3D environments. *Methods*

- 235 *Cell Biol.* **147**, 79–91 (2018).
- 236 16. Heuzé, M. L. *et al.* Migration of dendritic cells: physical principles, molecular  
237 mechanisms, and functional implications. *Immunol Rev* **256**, 240–254 (2013).
- 238 17. Heit, B. & Kubes, P. Measuring chemotaxis and chemokinesis: the under-agarose cell  
239 migration assay. *Sci. STKE* **2003**, PL5–p15 (2003).
- 240 18. Borowiak, M. *et al.* Photoswitchable Inhibitors of Microtubule Dynamics Optically  
241 Control Mitosis and Cell Death. *Cell* **162**, 403–411 (2015).
- 242 19. Liu, B. P., Chrzanowska-Wodnicka, M. & Burridge, K. Microtubule depolymerization  
243 induces stress fibers, focal adhesions, and DNA synthesis via the GTP-binding protein  
244 Rho. *Cell Adhes. Commun.* **5**, 249–255 (1998).
- 245 20. Takesono, A., Heasman, S. J., Wojciak-Stothard, B., Garg, R. & Ridley, A. J. Microtubules  
246 Regulate Migratory Polarity through Rho/ROCK Signaling in T Cells. *PLoS ONE* **5**, e8774–  
247 15 (2010).
- 248 21. Kwan, K. M. & Kirschner, M. W. A microtubule-binding Rho-GEF controls cell  
249 morphology during convergent extension of *Xenopus laevis*. *Development* **132**, 4599–  
250 4610 (2005).
- 251 22. Krendel, M., Zenke, F. T. & Bokoch, G. M. Nucleotide exchange factor GEF-H1 mediates  
252 cross-talk between microtubules and the actin cytoskeleton. *Nature Cell Biology* **4**,  
253 294–301 (2002).
- 254 23. Ren, Y., Li, R., Zheng, Y. & Busch, H. Cloning and characterization of GEF-H1, a  
255 microtubule-associated guanine nucleotide exchange factor for Rac and Rho GTPases.  
256 *Journal of Biological Chemistry* **273**, 34954–34960 (1998).
- 257 24. Renkawitz, J. *et al.* Adaptive force transmission in amoeboid cell migration. *Nature Cell*  
258 *Biology* **11**, 1438–1443 (2009).

259

260

261 **Figure legends**

262 **Figure 1. The microtubule organizing center acts as a pathfinder by coordinating protrusion**

263 **dynamics. a**, DC migrating within a pillar array. Upper panel shows EB3-mCherry expression  
264 profile. Lower panel outlines dynamic cell shape changes. Scale bar, 10 $\mu$ m. **b**, Time projection  
265 of image sequence shown in **a**. Left panel indicates MTOC position over time. Right panel  
266 outlines formation of multiple explorative protrusions over time. **c**, EMTB-mCherry expressing  
267 DC migrating under a pad of agarose. Purple box indicates protrusive cell front, whereas grey  
268 boxed area denotes contractile trailing edge. **d**, MT dynamics during directed migration.  
269 Growth (purple arrowheads) and shrinkage (white arrowheads) frequencies of individual MT  
270 filaments (according to EMTB labelling) were assessed in protrusive (front, purple box) vs.  
271 contractile (back, grey box) areas of the same migratory cell. Growth events and catastrophes  
272  $\geq 1\mu$ m were tracked for  $n = 10$  filaments in the respective region of  $N = 8$  cells. Mean  $\pm$  S.D.  
273 \*\*\*\*  $P \leq 0.0001$ . Scale bar, 5 $\mu$ m. **e**, Time-lapse sequence of control or PST-1 treated cells,  
274 which were locally photo-activated (red box) during migration under agarose (left panels).  
275 Middle panels display kymograph analysis of the photo-activated area shown on the left (red  
276 line). The time point of photo-activation is shown in red. Right panel: Frequency of local  
277 retractions upon photo-activation of control or PST-1 treated DCs during migration ( $n = 26$   
278 cells per condition  $\pm$  S.D. from  $N = 3$  experiments). \*  $P \leq 0.05$ , \*\*\*\*  $P \leq 0.0001$ .

279

280 **Figure 2. Microtubules coordinate protrusion dynamics via the contractile module. a**, Left

281 panel outlines channel geometry of path choice device. Middle panel: Lifeact-GFP expressing  
282 DC migrating within a path choice device of 5 $\mu$ m height. Time projection of signal distribution  
283 is shown in right panel. Scale bar, 10 $\mu$ m. **b**, Nocodazole-treated Lifeact-GFP expressing cell  
284 migrating within a path choice device. Note that the cell extends elongated protrusions into  
285 different channels. Red arrowhead denotes a cell rupturing event during the decision making  
286 process. Right panel outlines migratory behavior of cell and cellular fragment over time. **c**,  
287 Frequency of cell rupturing events during path choice decision. Control:  $n = 43$  cells;  
288 nocodazole:  $n = 44$  cells of  $N = 2$  experiments. **d**, Time lapse sequence of a cell migrating  
289 within a linear microchannel of 5 $\mu$ m height. **e**, Nocodazole-treated cell migrating in the same  
290 configuration as in **d**. **f**, Cell treated with a combination of Y27632 plus nocodazole migrating  
291 as shown in **d**. Scale bar, 10 $\mu$ m. **g**, Migration speed of control, nocodazole- (Noco.) treated or  
292 double-treated (Y./N.) cells using Y27632 and nocodazole within microchannels ( $n =$  minimum

293 of 74 cells per condition from N = 4 experiments). Boxes extend from 25th to 75th percentile.  
294 Whiskers span minimum to maximum values. \*\*\*\* P ≤ 0.0001. **h**, Directionalities of control,  
295 nocodazole- (Noco.) treated or double-treated (Y./N.) cells using Y27632 and nocodazole  
296 within microchannels (n = minimum of 74 cells per condition from N = 4 experiments). Boxes  
297 extend from 25th to 75th percentile. Whiskers span minimum to maximum values. \*\*\*\* P ≤  
298 0.0001, \*\*\*\* P ≤ 0.0001. **i**, DCs migrating within a collagen gel either non-treated (control) or  
299 double-treated with Y27632 and nocodazole (Y./N.). Note the different time intervals per  
300 condition. Red arrowheads indicate loss of cellular coherence in the double-treated cell. Scale  
301 bars, 10µm. **j**, Automated analysis of  $\gamma$ -directed speed of non-treated, nocodazole-treated  
302 (Noco.) or double-treated cells using Y27632 and nocodazole (Y./N.). Plot shows mean  
303 migration velocities over time ± S.D. from N = 4 experiments. **k**, Lifeact-GFP expressing DC  
304 double-treated with Y27632 plus nocodazole (Y./N.) migrating as in **a**. Red arrowhead denotes  
305 a cell rupturing event during the decision making process. Right panel outlines migratory  
306 behavior of cell and cellular fragment over time. **l**, Frequency of cell rupturing events during  
307 path choice decision. Control: n = 40 cells; Y./N. : n = 80 cells of N = 2 experiments. **m**, Lifeact-  
308 GFP expressing DC treated with Y27632 migrating as in **a**. Note the extended protrusions  
309 reaching far into separate channels without generating a productive decision within the  
310 indicated time. Time projection of signal distribution is shown in right panel.

311

312 **Figure 3. Microtubules mediate retraction of supernumerary protrusions via Lfc.** **a**, Time  
313 lapse sequence of a wildtype littermate control cell migrating within a path choice device.  
314 Scale bar, 10µm. **b**, Time lapse sequence of a  $Lfc^{-/-}$  cell migrating within a path choice device.  
315 Red arrowheads denote multiple rupturing events of a single cell. Scale bar, 10µm. **c**, Junction  
316 point passing times of  $Lfc^{+/+}$  (n = 79 cells of N = 3 experiments) and  $Lfc^{-/-}$  (n = 49 cells of N = 2  
317 experiments) DCs. Boxes extend from 25<sup>th</sup> to 75<sup>th</sup> percentile. Whiskers span minimum to  
318 maximum values. \*\*\* P ≤ 0.001. **d**, Junction point passing times depending on presence of  
319 single non-competing or multiple competing protrusions per cell of  $Lfc^{+/+}$  (n = 37 cells of N =  
320 3 experiments) and  $Lfc^{-/-}$  (n = 46 cells of N = 2 experiments) DCs. Boxes extend from 25<sup>th</sup> to  
321 75<sup>th</sup> percentile. Whiskers span minimum to maximum values. \*\* P ≤ 0.01. **e**, Frequency of cell  
322 rupturing events during path-choice decision of  $Lfc^{+/+}$  (n = 79 cells ± S.D. of N = 3 experiments)  
323 and  $Lfc^{-/-}$  (n = 52 cells ± S.D. of N = 2 experiments) DCs. **f**, Migration of DCs within straight,  
324 single constriction-containing microchannels. Graphs show constriction point passing times

325 of  $Lfc^{+/+}$  (n = 114 cells of N = 3 experiments) and  $Lfc^{-/-}$  (n = 195 cells of N = 3 experiments) DCs.  
326 Boxes extend from 25<sup>th</sup> to 75<sup>th</sup> percentile. Whiskers span minimum to maximum values.

327

328 **Figure 4. Lfc-dependent myosin accumulation controls cellular locomotion.** **a**, A myosin light  
329 chain-GFP (MLC-GFP) expressing DC migrating under agarose along a soluble CCL19 gradient.  
330 Central- (orange box) and peripheral- (purple box) MLC accumulation is outlined. Scale bar,  
331 10 $\mu$ m. MLC accumulation during migration under agarose in **(b)** wildtype- or **(c)**  $Lfc^{-/-}$  cells.  
332 Scale bar, 10 $\mu$ m. Middle panels indicate cell shapes over time. Right panels indicate mean  
333 MLC fluorescence distribution along the anterior-posterior polarization axis (dashed line) in  
334 80sec intervals. **d**, Localization of MLC accumulation during directed migration of  $Lfc^{+/+}$  (red)  
335 and  $Lfc^{-/-}$  (blue) DCs. To account for differences in cell length the distance between cell center  
336 and MLC accumulation was normalized to cell length. Graph shows distance of n = 7 migratory  
337 cells per condition  $\pm$  S.D. **e**, Localization of endogenous phospho-MLC(S19) in fixed migratory  
338 DCs (left panel). Right panel indicates position of MLC accumulation relative to cell length of  
339 n = 16 cells per condition from N = 4 experiments. Boxes extend from 25<sup>th</sup> to 75<sup>th</sup> percentile.  
340 Whiskers span minimum to maximum values. \*\*\*\* P  $\leq$  0.0001. Scale bar, 10 $\mu$ m. **f**, *In situ*  
341 migration of exogenous DCs on a mouse ear sheet. Lymphatic vessels were stained for Lyve-  
342 1, DCs with TAMRA respectively. Right panel indicates the mean distance of cells from  
343 lymphatic vessels. Per experiment two mouse ears with two fields of view were analyzed of  
344 N = 4 experiments. Boxes extend from 25<sup>th</sup> to 75<sup>th</sup> percentile. Whiskers span minimum to  
345 maximum values. \* P  $\leq$  0.05. Scale bar, 100 $\mu$ m. **g**, Automated analysis of  $\gamma$ -directed migration  
346 speed within a collagen network along soluble CCL19 gradient. Plot shows mean migration  
347 velocities over time  $\pm$  S.D. from N = 7 experiments. **h**, Upper panels: Cell outlines of  $Lfc^{+/+}$  (left)  
348 and  $Lfc^{-/-}$  (right) DCs migrating within a collagen network along a soluble CCL19 gradient. Scale  
349 bar, 10 $\mu$ m. Lower panel shows lengths of cells migrating within a collagen network of n = 85  
350 individual cells per condition from N = 4 experiments. Boxes extend from 25<sup>th</sup> to 75<sup>th</sup>  
351 percentile. Whiskers span minimum to maximum values. \*\*\* P  $\leq$  0.001.

352

353 **Figure 5. Lfc regulates microtubule-mediated adhesion resolution.** Cell shape outlines of  
354 non-treated control cells migrating under agarose under adhesive **(a)** or repellent (PEG  
355 coated) **(b)** conditions. Cell shape outlines of nocodazole-treated cells migrating under  
356 agarose under adhesive **(c)** or repellent (PEG coated) **(d)** conditions. Upper panels show

357 littermate control wildtype cells, lower panels show  $Lfc^{-/-}$  cells. Scale bars,  $10\mu\text{m}$ . **e**, Cell  
358 lengths of non-treated control cells migrating under adhesive and repellent conditions ( $n =$   
359 minimum of 80 cells per condition from  $N = 5$  experiments). Boxes extend from 25<sup>th</sup> to 75<sup>th</sup>  
360 percentile. Whiskers span minimum to maximum values. \*\*\*\*  $P \leq 0.0001$ . **f**, Cell lengths of  
361 nocodazole-treated cells migrating under adhesive and repellent conditions ( $n =$  minimum of  
362 80 cells per condition from  $N = 5$  experiments). Boxes extend from 25<sup>th</sup> to 75<sup>th</sup> percentile.  
363 Whiskers span minimum to maximum values. \*\*\*\*  $P \leq 0.0001$ . **g**, Migration distance of  $Lfc^{+/+}$   
364 and  $Lfc^{-/-}$  DCs migrating under agarose under non-adhesive (PEG coated) conditions of  $n =$   
365 minimum of 80 cells per condition from  $N = 5$  experiments. Cells were either non-treated or  
366 treated with nocodazole. Boxes extend from 25<sup>th</sup> to 75<sup>th</sup> percentile. Whiskers span minimum  
367 to maximum values. \*  $P \leq 0.05$ , \*\*\*\*  $P \leq 0.0001$ . **h**, Directionalities of  $Lfc^{+/+}$  and  $Lfc^{-/-}$  DCs  
368 migrating under agarose under non-adhesive conditions (PEG). Cells were either non-treated  
369 or nocodazole- treated ( $n =$  minimum of 80 cells per condition from  $N = 5$  experiments). Boxes  
370 extend from 25<sup>th</sup> to 75<sup>th</sup> percentile. Whiskers span minimum to maximum values. \*\*\*\*  $P \leq$   
371 0.0001.  
372

373

## 374 **Materials and Methods**

### 375 **Mice**

376 All mice used in this study were bred on a C57BL/6J background and maintained at the  
377 institutional animal facility in accordance with the IST Austria ethics commission in  
378 accordance with the Austrian law for animal experimentation. Permission of all experimental  
379 procedures was granted and approved by the Austrian federal ministry of science, research  
380 and economy (identification code: BMWF-66.018/0005-II/3b/2012).

### 381 **Generation of *Lfc*<sup>-/-</sup> mice**

382 A cosmid containing the full genomic sequence of the gene that encodes *Lfc* (*Arhgef2*) was  
383 isolated from a 129 mouse genomic library with *Lfc* cDNA probes (106-630, 631-1057 and  
384 1060-1478 bp) amplified by RT-PCR. The genomic DNA region between base pairs 1193-1477,  
385 coding for amino acids 351-445 in the DH domain and DH/PH domain interface was  
386 exchanged for a neomycin cassette flanked by LoxP sites. The targeting construct was  
387 linearized with *NotI* and electroporated into R1 ES cells. Homologous recombinants were  
388 selected in the presence of G418 (150 µg/ml) and gancyclovir (2 µM) and analyzed by  
389 Southern blotting. Positive embryonic stem cell clones were aggregated with eight cell-stage  
390 mouse embryos to generate chimeras. The resulting mice were genotyped by Southern blot  
391 and PCR. Primers (5'–CGGGGATCCATTCGGTTGTAA–3') and (5'–AAGCGGCATGGAGTTCAGGA  
392 –3') amplified a 365-bp fragment specific for the wild type allele, whereas primers (5'–  
393 AGAGTTCTGCAGCCGCCACACCA–3') and 5'–GGTGGGGGTGGGGTGGGATTAGATA –3')  
394 amplified a 500-bp fragment specific for the targeted allele. We refer to these mice as *Lfc*<sup>-/-</sup>  
395 mice throughout the entire manuscript. Western blot analysis using a *Lfc*-specific antibody  
396 was performed to confirm that *Lfc*<sup>-/-</sup> mice had no expression of *Lfc* protein. Mice were  
397 backcrossed to C57BL/6 background for more than 12 generations. Dendritic cells were  
398 generated from bone marrow isolated from littermates or age-matched wildtype and *Lfc*<sup>-/-</sup> 8-  
399 12 week-old mice. Mice were bred and housed in accordance with institutional guidelines.

400

### 401 **Generation of immortalized hematopoietic progenitor reporter cell lines**

402 Hematopoietic progenitor cell lines were generated by retroviral delivery of an estrogen-  
403 regulated form of *HoxB8* as described recently<sup>25,26</sup>. Briefly, bone marrow of 6-12 week of

404  $Lfc^{+/+}$  and  $Lfc^{-/-}$  mice was isolated and retrovirally transduced with an estrogen-regulated form  
405 of the HoxB8 transcription factor. After expansion of immortalized cells, lentiviral spin  
406 infection (1500g, 1h) was carried out in the presence of 8 $\mu$ g/ml Polybrene and the lentivirus  
407 coding for fluorescent expression construct of interest. Following transduction, cells were  
408 selected for stable virus insertion using 10 $\mu$ g/ml Blasticidin for at least one week. Cells  
409 expressing fluorescent reporter constructs were sorted using fluorescence-activated cell  
410 sorting (FACS Aria III, BD Biosciences) prior to migration experiments.

411

#### 412 **Dendritic cell culture**

413 Culture was started either from freshly isolated bone marrow of 6-12 week old mice with  
414 C57BL/6J background (wildtype,  $Lfc^{-/-}$ , or Lifeact-GFP<sup>27</sup> as described earlier<sup>28</sup> or from stable  
415 hematopoietic progenitor cell lines after washing out estrogen. DC differentiation was  
416 induced by plating 2x10<sup>6</sup> cells (bone marrow) or 2x10<sup>5</sup> cells (progenitor cells) in complete  
417 media (RPMI 1640 supplemented with 10% Fetal Calf Serum, 2mM L-Glutamine, 100U/ml  
418 Penicillin, 100 $\mu$ g/ml Streptomycin, 50 $\mu$ M  $\beta$ -Mercaptoethanol) (all purchased from Invitrogen)  
419 containing 10% Granulocyte-Monocyte colony stimulating factor (GM-CSF, supernatant from  
420 hybridoma culture). To induce maturation, cells were stimulated overnight with 200ng/ml  
421 Lipopolysaccharide from *E.coli* 0127:B8 (Sigma) and used for experiments on days 9-10.

422

#### 423 ***In situ* migration assay**

424 Six to eight weeks old female C57BL/6J mice were sacrificed and individual ear sheets  
425 separated into dorsal and ventral halves as described previously<sup>29</sup>. Cartilage free ventral  
426 halves were incubated for 48h at 37°C, 5% CO<sub>2</sub> with ventral side facing down in a well plate  
427 filled with complete medium. The medium was changed once 24h post-incubation-start. If  
428 indicated, pharmacological inhibitors were added to the medium. Ear sheets were fixed with  
429 1% PFA followed by immersion in 0.2% Triton X-100 in PBS for 15min and three washing steps  
430 á 10min with PBS. Unspecific binding was prevented by 60min incubation in 1%BSA in PBS at  
431 room temperature. Incubation with primary rat-polyclonal antibody against LYVE-1 in  
432 combination with rat-polyclonal biotinylated anti-MHC-II antibody (both R&D Systems) was  
433 done for 2h at room temperature. After three times 10min washing with 1% BSA in PBS  
434 consecutive incubation using Alexa Fluor 488-AffiniPure F(ab')<sub>2</sub> fragment donkey anti-rat IgG  
435 (H+L) secondary antibody and streptavidin-Cy3 secondary antibody (both Jackson



436 ImmunoResearch) was done. Samples were incubated 45min in first secondary antibody in  
437 the dark followed by 10min washing in 1% BSA in PBS and subsequent incubation with second  
438 secondary antibody. Samples mounted with ventral side up on a microscope slide, protected  
439 with a coverslip and stored at 4°C in the dark.

440 In order to determine the distance between the lymphatic vessels and DCs a mask was  
441 created by manually outlining lymphatic vessels depending on Lyve-1 staining and segmenting  
442 cells according to their fluorescence intensity. The distance between cells and lymphatic  
443 vessels was quantified using a custom-made Matlab script, which determines the closest  
444 distance from the segmented cells to the border of the lymphatic vessel binary image. Image  
445 borders were excluded from analysis.

446

#### 447 ***In vitro* collagen gel migration assay**

448 Custom made migration chambers were assembled by using a plastic dish containing a 17mm  
449 hole in the middle, which was covered by coverslips on each side of the hole. Three-  
450 dimensional scaffolds consisting of 1.73mg/ml bovine Collagen I were reconstituted *in vitro*  
451 by mixing  $3 \times 10^5$  cells in suspension with Collagen I suspension buffered to physiological pH  
452 with Minimum Essential Medium and Sodium Bicarbonate in a 1:2 ratio. To allow  
453 polymerization of Collagen fibers, gels were incubated 1h at 37°C, 5% CO<sub>2</sub>. Directional cell  
454 migration was induced by overlaying the polymerized gels with 0.63µg/ml CCL19 diluted in  
455 complete media (R&D Systems). To prevent drying-out of the gels, migration chambers were  
456 sealed with Paraplast X-tra (Sigma-Aldrich). The acquisition was performed in 60sec intervals  
457 for five hours at 37°C, 5% CO<sub>2</sub>. Detailed description of experimental procedure can be found  
458 elsewhere<sup>30</sup>.

459

#### 460 **Analysis of y-displacement**

461 Quantification of y-directed migration analysis of cell population was performed as described  
462 earlier<sup>31</sup>. Briefly, raw data image sequences were background corrected and particles smaller  
463 and bigger than an average cell were excluded. For each time point the lateral displacement  
464 in y-direction was determined with the previous frame to generate the best overlap, which  
465 yields the y-directed migration velocity of a cell population.

466

#### 467 **Migration within micro-fabricated polydimethylsiloxane (PDMS) based devices.**

468 Generation of PDMS-based devices and detailed experimental protocols can be found  
469 elsewhere<sup>15,31</sup>. Briefly, photomasks were designed using Coreldraw X18, printed on a  
470 photomask (5" square quartz, 1 $\mu$ m resolution, JD Photo data), followed by a spin coating step  
471 using SU-8 2005 (3000 RPM, 30sec, Microchem, USA) and a prebake of 2 min at 95°C. The  
472 wafer was then exposed to ultra-violet light (90 – 105 mJ/cm<sup>2</sup> on an EVG mask aligner). After  
473 a post-exposure bake of 3 min 95°C, the wafer was developed in PGMEA. A one-hour  
474 silanization with Trichloro(1H,1H,2H,2H-perfluorooctyl)silane was applied to the wafer. The  
475 devices were made with a 1:10 mixture of Sylgard 184 (Dow Corning). Air bubbles were  
476 removed with a desiccator. The PDMS was cured overnight at 85°C. Micro-devices were  
477 attached to ethanol cleaned coverslips after plasma cleaning for 1h at 85°C. Before  
478 introduction of cells, devices were flushed and incubated with complete medium for at least  
479 1h. To visualize the chemokine gradient, similar sized fluorescent dextran conjugated to  
480 fluorescein isothiocyanate (FITC) was added to the chemokine solution (200 $\mu$ g/ml, 10kDa,  
481 Sigma) due to exhibiting similar diffusion characteristics<sup>32</sup>.

482

#### 483 ***In vitro* under-agarose migration assay**

484 To obtain humid migration chambers a 17mm plastic ring was attached to a glass bottom dish  
485 using Paraplast X-tra (Sigma-Aldrich) to seal attachment site. For under-agarose migration  
486 assay, 4% Ultra Pure Agarose (Invitrogen) in nuclease-free water (Gibco) was mixed with  
487 phenol-free RPMI-1640 (Gibco) supplemented with 20% FCS, 1x Hanks buffered salt solution  
488 pH 7.3 in a 1:3 ratio. Ascorbic acid was added to final concentration of 50 $\mu$ M and a total  
489 volume of 500 $\mu$ l agarose-mix was cast into each migration chamber. After polymerization, a  
490 2mm hole was punched into the agarose pad and 2.5 $\mu$ g/ml CCL19 (R&D Systems) was placed  
491 into the hole to generate a soluble chemokine gradient. Outer parts of the dish were filled  
492 with water followed by 30-minute equilibration at 37°C, 5% CO<sub>2</sub>. The cell suspension was  
493 injected under agarose opposite of the chemokine hole to confine DCs between coverslip and  
494 agarose. Prior to acquisition, dishes were incubated at least two hours at 37°C, 5% CO<sub>2</sub> to  
495 allow recovery and persistent migration of cells. During acquisition, dishes were held under  
496 physiological conditions at 37°C and 5% CO<sub>2</sub>.

497

#### 498 **Immunofluorescence**

499 For fixation experiments a round shaped coverslip was placed in glass bottom dish before  
500 casting of agarose and injection of cells. Migrating cells were fixed by adding prewarmed 4%  
501 Para-Formaldehyde (PFA) diluted in cytoskeleton Buffer pH6.1 (10mM MES, 150mM NaCl,  
502 5mM EGTA, 5mM Glucose, 5mM MgCl<sub>2</sub>) directly on top of the agarose. After fixation, agarose  
503 pad was carefully removed using a coverslip-tweezer followed by 20min incubation of the  
504 coverslip in 0.5% Triton X-100 in PBS and three subsequent washing steps á 10min with Tris-  
505 buffered saline (TBS) containing 0.1% Tween-20 (Sigma). Samples were blocked to prevent  
506 unspecific binding by incubating 60min in blocking solution (5% BSA, 0.1% Tween-20 in TBS).  
507 Immunostainings were carried out consecutively by 2h incubation with rat monoclonal anti-  
508 alpha-tubulin (AbD serotec), mouse anti-phospho-Myosin light chain 2 (S19) (Cell signaling),  
509 mouse anti-gamma tubulin (Sigma) or rabbit anti-acetylated alpha-tubulin (Sigma). Followed  
510 by 3x10min washing with blocking solution and 30min incubation using Alexa Fluor® 488-  
511 AffiniPure F(ab')<sub>2</sub> or Alexa Fluor® 647-AffiniPure F(ab')<sub>2</sub> Fragment IgG (H+L) (both Jackson  
512 Immuno) secondary antibodies. After incubation washing was done at least three times á  
513 5min. Samples were conserved in non-hardening mounting medium with DAPI  
514 (VectorLaboratories) and stored at 4°C in the dark.

515

#### 516 **Immunodetection of whole cell lysates**

517 3x10<sup>5</sup> cells were serum starved for 1h followed by drug treatment. After harvesting, cell pellet  
518 was snap frozen and lysed using RIPA buffer (Cell Signaling) to which 1mM  
519 Phenylmethylsulfonylfluoride was added prior to usage. Samples were supplemented with  
520 LDS Sample Buffer and Reducing agent (both Invitrogen) and incubated for 5min at 90°C  
521 before loading on pre-cast 4-12% Bis-Tris acrylamide gel (Invitrogen). Subsequently, samples  
522 were transferred to Nitrocellulose membrane using iBlot system (Invitrogen) and blocked for  
523 1h in 5% bovine serum albumin in TBS containing 0.01% Tween-20. For whole cell lysate  
524 protein detection following antibodies were used: rabbit anti phospho-Myosin Light Chain 2  
525 (S19) (1:500), rabbit anti Myosin Light Chain 2 (1:500), rabbit anti GEF-H1 (the mammalian  
526 homologue of Lfc) (1:500), rabbit anti phospho-ERM (1:500), rabbit anti ERM (1:500, all Cell  
527 Signaling), mouse anti glyceraldehyde 3-phosphate dehydrogenase (GAPDH) (1:1000,  
528 BioRad). As secondary antibodies Horseradish Peroxidase (HRP) Conjugated Anti-rabbit and  
529 anti-mouse IgG (H + L) antibodies were used in 1:5000 dilutions and enzymatic reaction was  
530 started by addition of chemoluminescent substrate for HRP (Super Signal West Femto).

531 Chemoluminescence was acquired using a VersaDoc imaging system (BioRad). Western blot  
532 signals were quantified manually by normalization to input values and subsequent  
533 comparison of each treatment to signal intensity of steady-state level (i.e. control sample).

534

### 535 **Flow cytometry**

536 Before staining,  $1-2 \times 10^6$  cells were incubated for 15 min at +4°C with blocking buffer (1xPBS,  
537 1% BSA, 2mM EDTA) containing 5mg/ml  $\alpha$ -CD16/CD32 (2.4G2, BD Biosciences). For surface  
538 staining, cells were incubated for 30 min at 37°C with conjugated monoclonal antibodies  
539 (mAbs; mouse  $\alpha$ -CCR7-PE (4B12), rat  $\alpha$ -mouse I-A/I-E-eFluor450 (M5/114.15.2), hamster  $\alpha$ -  
540 mouse CD11c-APC (N418) diluted at the recommended concentration in blocking buffer. Flow  
541 cytometry analysis was performed on a FACS CANTO II flow cytometer (BD Biosciences).

542

### 543 **Pharmacological inhibitors**

544 For perturbation of cytoskeletal and myosin dynamics we used final concentrations of 300nM  
545 Nocodazole and 10 $\mu$ M Y27632 (all purchased from Sigma Aldrich). Nocodazole was dissolved  
546 in dimethylsulfoxide (DMSO; Sigma Aldrich) and Y27632 in poly-buffered saline. Control  
547 samples were usually treated with 1:1000 DMSO if not indicated differentially.

548

### 549 **Fluorescent reporter constructs**

550 Generation of a C-terminal eGFP fusion construct of Lfc was carried out by amplifying Lfc from  
551 DC cDNA using a NotI restriction site containing forward (5'  
552 ATATGCGGCCGCAATCTCGGATCGAATCCCTCACTCGCG 3') and reverse (5'  
553 ATATGCGGCCGCTTAGCTCTCTGAAGCTGTGGGCTCC 3') primer pair. After NotI digestion, Lfc  
554 was cloned into a pcDNA3.1 backbone containing eGFP (Express Link™ T4 DNA-Ligase).  
555 Correct sequence and orientation of clones was verified by sequencing (Eurofins). The  
556 fluorescent plasmid DNA reporter construct coding for EB3-GFP was a kind gift of V. Small  
557 (IMBA, Austria). M. Olson (Beatson Institute) generously provided MLC constructs (either  
558 fused to eGFP or RFP)<sup>33</sup> and EMTB-3xmCherry constructs were a kind gift of (W. M. Bement,  
559 University of Wisconsin)<sup>34</sup>. Gateway cloning technology™ was employed to generate  
560 lentivirus from plasmid DNA constructs. Briefly, corresponding DNA segments were amplified  
561 using primers containing overhangs with *attB1* and *attB2* recombination sites on the 3'- and  
562 the 5'-end respectively. In order to obtain an EMTB fusion construct carrying a single mCherry

563 tag, the PCR product was size separated via gel electrophoresis and only the fragment of  
564 corresponding size (EMTB: 816bp, mCherry: 705bp) was further processed. Gel purified PCR  
565 fragments were inserted into pcDNA221 entry vectors (Invitrogen) via BP recombination  
566 reaction, generating the entry clone. Expression clones were obtained by carrying out the LR  
567 recombination reaction between entry clone and pLenti6.3 destination vector (Invitrogen).  
568 Lentivirus production was carried out by co-transfecting LX-293 cells (Chemicon) with the  
569 expression clone of interest in conjunction with pdelta8.9 (packaging plasmid) and pCMV-  
570 VSV-G (envelope plasmid) (plasmids were a gift from Bob Weinberg)<sup>35</sup>. The supernatant of  
571 virus-producing cells was harvested 72h after transfection, snap frozen and stored at -80°C  
572 after sterile filtration.

573

#### 574 **Transgene delivery**

575 To induce expression of fluorescently labeled proteins DCs were transfected according to  
576 manufacturer guidelines using nucleofector kit for primary T cells (Amaxa, Lonza Group).  
577 Briefly,  $5 \times 10^6$  were resuspended in 100µl reconstituted nucleofector solution, transferred to  
578 an electroporation cuvette and a total amount of 4µg plasmid DNA was added. Cells were  
579 transfected by using a protocol specifically designed for electroporating immature mouse DCs  
580 (program X-001). After transfection, cells were cultured in 60mm cell culture dishes in  
581 complete media and taken for experiments 24h post-transfection. Due to low transfection  
582 efficiency of primary cells, transfected cells were FACS sorted prior to experiment using FACS  
583 Aria III (BD Biosciences).

584

#### 585 **Luminometric RhoA activity assay**

586 RhoA activities were determined using G-LISA™ RhoA Activation Assay Biochem Kit™  
587 (Cytoskeleton) according to the manufacturer's instructions. Briefly,  $4 \times 10^5$  mature BMDCs  
588 were lysed in 70µl RIPA buffer (Cell Signaling) and protein concentration determined using  
589 the Precision Red™ Advanced Protein Assay Reagent (Cytoskeleton). Respective samples  
590 were treated with 300nM Nocodazole for 15 min before lysis. All samples were adjusted to a  
591 final protein concentration of 0.5mg/ml. Luminescence signals were measured using a  
592 microplate photometer at 600nm. Wells containing lysis buffer only were used as reference  
593 blanks in all experiments.

594

## 595 **Microscopy**

596 During all live cell imaging experiments cells were held under physiological conditions at 37°C,  
597 5% CO<sub>2</sub> in a humidified chamber. Low magnification bright field or DIC time-lapse acquisition  
598 was carried out using inverted routine microscopes (Leica), equipped with PAL cameras  
599 (Prosilica, Brunaby, BC) controlled by SVS-Visitek software (Seefeld, Germany) using 4x, 10x,  
600 20x objectives or an inverted Nikon Eclipse widefield microscope using a C-Apochromat  
601 20x/0.5 PH1 air equipped with a Lumencor light engine (wavelengths [nm]: 390, 475,  
602 542/575). For high magnification live cell acquisition, either an Andor spinning disc confocal  
603 scanhead installed on an inverted Axio observer microscope (Zeiss), using a C-Apochromat  
604 63x/1.2 W Korr UV-VIS-IR objective, or a total internal reflection (TIRF) setup consisting of an  
605 inverted Axio observer microscope (Zeiss), a TIRF 488/561 nm laser system (Visitron systems)  
606 and an Evolve™ EMCCD camera (Photometrics) triggered by VisiView software (Visitron) was  
607 chosen. Photo-activation experiments were conducted on an inverted Spinning disc  
608 microscope (iMic) using a 60x/1.35 Oil objective. TAMRA stained DCs were either untreated  
609 or treated with 10μM PST-1 in the dark and recorded using a 561nm laser line in 2-second  
610 intervals. Photoactivation was carried out on directionally migrating cells using a 405 nm laser  
611 line (pixel dwell time: 10 ms, interval: 40 sec). FRAP calibration was carried out on separate  
612 samples before each experiment. Acquisition of fixed samples (*in situ* ear crawl in and  
613 immunofluorescence samples) was carried out using an upright confocal microscope  
614 (LSM700, Zeiss) equipped with a Plan-Apochromat 20x/1.0 W DIC (UV) VIS-IR or a Plan-  
615 Apochromat 63x/1.4 Oil objective.

616

## 617 **Statistics**

618 All boxes in Box-Whisker plots boxes extend from 25<sup>th</sup> to 75<sup>th</sup> percentile and whiskers span  
619 minimum to maximum values. Graphs represent pooled data of several cells (n) from  
620 independent biological experiments (N) as mentioned in the figure legends. Individual  
621 experiments were validated separately and only pooled if showing the same trend. For  
622 representation of frequencies, bar charts depict mean values from several independent  
623 biological experiments (N) ± S.D. Statistical analysis was conducted out using GraphPad Prism.

624

## 625 **Supplementary References**

626 25. Redecke, V. *et al.* Hematopoietic progenitor cell lines with myeloid and lymphoid

- 627 potential. *Nat Meth* 1–13 (2013). doi:10.1038/nmeth.2510
- 628 26. Leithner, A. *et al.* Fast and efficient genetic engineering of hematopoietic precursor  
629 cells for the study of dendritic cell migration. *Eur. J. Immunol.* **48**, 1074–1077 (2018).
- 630 27. Riedl, J. *et al.* Lifeact mice for studying F-actin dynamics. *Nat Meth* **7**, 168–169 (2010).
- 631 28. Lutz, M. B. *et al.* An advanced culture method for generating large quantities of highly  
632 pure dendritic cells from mouse bone marrow. *Journal of Immunological Methods* **223**,  
633 77–92 (1999).
- 634 29. Pflücke, H. & Sixt, M. Preformed portals facilitate dendritic cell entry into afferent  
635 lymphatic vessels. *Journal of Experimental Medicine* **206**, 2925–2935 (2009).
- 636 30. Sixt, M. & Lämmermann, T. In vitro analysis of chemotactic leukocyte migration in 3D  
637 environments. *Methods Mol. Biol.* **769**, 149–165 (2011).
- 638 31. Leithner, A. *et al.* Diversified actin protrusions promote environmental exploration but  
639 are dispensable for locomotion of leukocytes. *Nature Cell Biology* **18**, 1253–1259  
640 (2016).
- 641 32. Schwarz, J. *et al.* A microfluidic device for measuring cell migration towards substrate-  
642 bound and soluble chemokine gradients. *Sci Rep* **6**, (2016).
- 643 33. Croft, D. R. *et al.* Actin-myosin-based contraction is responsible for apoptotic nuclear  
644 disintegration. *The Journal of Cell Biology* **168**, 245–255 (2005).
- 645 34. Miller, A. L. & Bement, W. M. Regulation of cytokinesis by Rho GTPase flux. *Nature Cell*  
646 *Biology* **11**, 71–U137 (2009).
- 647 35. Stewart, S. A. *et al.* Lentivirus-delivered stable gene silencing by RNAi in primary cells.  
648 *RNA* **9**, 493–501 (2003).
- 649

650 **Supplementary Figure 1. DC migration within diverse matrices to study the role of the MT**  
651 **cytoskeleton during cell migration. a**, Schematic representation of migration assays used in  
652 this study. Assays range from highly complex (top) and relatively uncontrollable geometries  
653 to very simple and precisely controllable PDMS-based structures (bottom). Complexity of the  
654 geometrical confinement correlates with dynamic shape changes of cells. Upward-facing  
655 arrows indicate high geometrical complexity and cell shape changes respectively. Downward-  
656 facing arrows indicate low complexity. **b**, Cell shape changes of a DC migrating in a collagen  
657 matrix along a soluble CCL19 gradient. **c**, Dynamic cell shape changes are recapitulated during  
658 migration within a defined array of PDMS-based pillar structures. **d**, Left panel: Cells migrating  
659 under agarose display a protrusive lamellipodium (lower panel: montage of boxed area)  
660 followed by a contractile trailing edge. Scale bar, 10 $\mu$ m. Middle panel: EB3-mCherry localizes  
661 to the plus tips of tubulin-GFP decorated MT filaments. Shown is a double-reporter DC  
662 migrating under agarose along a soluble CCL19 gradient. Scale bar, 10 $\mu$ m. Right panel: EB3-  
663 mCherry faithfully tracks growing MT filaments during DC migration. White arrowhead  
664 highlight the localization of EB3 signal at the tip of polymerizing tubulin filaments as the cell  
665 advances. Scale bar 5 $\mu$ m. **e**, MT nucleation from centrosomal origin determined by alpha- and  
666 gamma-tubulin staining. Right panel shows line scan of signal intensities along purple line in  
667 merged image. Scale bar, 10 $\mu$ m. **f**, Determination of MTOC position by alpha- and gamma-  
668 tubulin staining with respect to the nucleus. Mean  $\pm$  S.D. of  $n = 256$  cells from  $N = 3$   
669 experiments. **g**, Time-course analysis of MT filament dynamics of migrating DCs expressing  
670 EMTB-mCherry. Upper panel indicates leading edge area. The purple arrow represents  
671 membrane protrusion and the purple arrowheads represent elongating MT filaments. Lower  
672 panel indicates trailing edge area in which black arrow represents membrane retraction and  
673 black arrowheads MT filament depolymerization. Red dashed line indicates cell edges. Scale  
674 bar, 10 $\mu$ m. **h**, EB3-mCherry localization of control or PST-1 treated cells migrating under  
675 agarose along a soluble CCL19 gradient. The red box indicates photo-activated area magnified  
676 on the right. Magnified regions show time projection of EB3-mCherry intensities after local  
677 photo-activation. Lower panel indicates fluorescence intensity evolution upon photo-  
678 activation of control or PST-1 treated cells. The red line highlights the time point of initial  
679 photo-activation. Purple arrows indicate the direction of cell migration.

680



681 **Supplementary Figure 2. Perturbation of the MT cytoskeleton affects DCs migration on**  
682 **multiple levels. a**, Non-treated control or nocodazole-treated cells migrating under agarose  
683 towards a CCL19 gradient were fixed and stained for endogenous distribution of alpha-tubulin  
684 and F-actin. Scale bar 10 $\mu$ m. **b**, *In situ* migration of endogenous DCs on a mouse ear sheet. Z-  
685 projections of separated ear sheets upon control conditions or nocodazole treatment.  
686 Lymphatic vessels were stained for Lyve-1, DCs for MHC-II. Mean distance from lymphatic  
687 vessels of endogenous DCs was determined 48h after ear separation (right panel). Per  
688 condition, four mouse ears with two fields of view were analyzed. Boxes extend from 25<sup>th</sup> to  
689 75<sup>th</sup> percentile. Whiskers span minimum to maximum values. \*\*  $P \leq 0.01$ . Scale bar, 100 $\mu$ m.  
690 **c**, Nocodazole-treated DC migrating in a collagen gel towards a soluble CCL19 gradient. Yellow  
691 line outlines cell shape. Red arrowheads indicate loss of cellular coherence. Scale bar, 100 $\mu$ m.  
692 **d**, Individual cell migration trajectories of cells migrating under agarose upon control  
693 conditions and nocodazole treatment of n = 58 cells (Control) and n = 52 cells (Noco.) from N  
694 = 4 experiments. **e**, Individual cell outlines over time upon control or nocodazole-treated  
695 conditions. Note the stable polarization of control cells contrasting the oscillatory protrusion  
696 dynamics of nocodazole-treated cells. **f**, Directionality during migration under agarose of n =  
697 50 cells per condition from N = 4 experiments was assessed by comparing accumulated- with  
698 euclidean-distance of manually tracked cell trajectories. Boxes extend from 25<sup>th</sup> to 75<sup>th</sup>  
699 percentile. Whiskers span minimum to maximum values \*\*\*\*  $P \leq 0.0001$ . **g**, Migration speed  
700 during migration under agarose along a soluble CCL19 gradient upon control conditions and  
701 nocodazole treatment of n = 50 cells per condition from N = 4 experiments. Boxes extend  
702 from 25<sup>th</sup> to 75<sup>th</sup> percentile. Whiskers span minimum to maximum values. **h**, Levels of active  
703 RhoA upon MT depolymerization with nocodazole determined by luminometry. RhoA activity  
704 levels were normalized to nocodazole-treated samples. Plotted is mean  $\pm$  S.D. from N = 3  
705 experiments. \*\*\*\*  $P \leq 0.0001$ . **i**, Levels of MLC phosphorylation determined by Western Blot  
706 analysis. Cells were treated with the indicated compounds (DMSO, nocodazole or Y27632  
707 together with nocodazole (Y./N.)). Mean fluorescence intensity of pMLC was normalized to  
708 GAPDH signal and shown as fold increase relative to DMSO control  $\pm$  S.D in right panel. Blots  
709 are representative of N = 3 experiments.

710

711 **Supplementary Figure 3. Generation of a *Lfc*<sup>-/-</sup> mouse line. a**, Integration of the *Lfc* targeting  
712 vector into genomic locus. Black boxes represent exons. The neo-lox P cassette was cloned in

713 reverse orientation into two, replacing a *SmaI-XhoI* segment. Locations of primers used for  
714 PCR are indicated with triangles. Probes A and B were used for Southern blot detection of  
715 short and long arms, respectively. *S*, *SmaI*; *Xh*, *XhoI*; *X*, *XbaI*; *N*, *NheI*. **b**, Southern blot analysis.  
716 Genomic DNA from *Lfc*<sup>+/+</sup>, *Lfc*<sup>+/-</sup> and *Lfc*<sup>-/-</sup> mice was digested with *XbaI* and hybridized with  
717 probes B (left panel) and genomic DNA from *Lfc*<sup>+/+</sup> and *Lfc*<sup>+/-</sup> embryonic stem cells were  
718 hybridized with probe A (right panel). **c**, PCR analysis of tail DNA from *Lfc*<sup>+/+</sup>, *Lfc*<sup>+/-</sup> and *Lfc*<sup>-/-</sup>  
719 mice. Locations of primers used for PCR are indicated with triangles in **a**. **d**, Immunoblot  
720 analysis of total thymus cell lysates probed for *Lfc* protein content. **e**, Cell morphologies of  
721 immature (NT) and mature (+LPS) *Lfc* wildtype (upper-lane) and *Lfc*-deficient (lower-lane)  
722 littermate DCs. Note the presence of multiple veils in both LPS-treated samples. **f**, DC  
723 differentiation markers (MHC-II and CCR7) of *Lfc*<sup>+/+</sup> (blue line) and *Lfc*<sup>-/-</sup> (red line) littermate  
724 DCs compared to unstained cells (grey peak).

725

726 **Supplementary Figure 4. *Lfc*<sup>-/-</sup> DCs exhibit reduced contractile responses.** **a**, Path choice  
727 preference of *Lfc*<sup>+/+</sup> and *Lfc*<sup>-/-</sup> DCs migrating within a path choice assay. Shown are mean  
728 frequencies of *Lfc*<sup>-/-</sup> (n = 49 cells of N = 2 experiments) and *Lfc*<sup>+/+</sup> (n = 79 cells of N = 3  
729 experiments) DCs. **b**, Levels of active RhoA of *Lfc*<sup>+/+</sup> and *Lfc*<sup>-/-</sup> cells was determined by  
730 luminometry showing mean intensities ± S.D. from N = 3 experiments. \*\*\*\* P ≤ 0.0001. **c**,  
731 Levels of MLC phosphorylation in *Lfc*<sup>+/+</sup> and *Lfc*<sup>-/-</sup> DCs assessed by Western Blot analysis. Cells  
732 were treated with the indicated compounds (DMSO, CCL21, nocodazole, Y27632 together  
733 with nocodazole). **d**, Mean fluorescence intensity of phospho-MLC was normalized to GAPDH  
734 signal and shown as fold increase relative to DMSO control ± S.D. Blots are representative of  
735 N = 3 experiments. **e**, Centrosome localization in *Lfc*<sup>-/-</sup> DCs migrating under agarose assessed  
736 by alpha- and gamma-tubulin co-staining (n = 117 cells from N = 2 experiments). **f**, MT  
737 nucleation from centrosomal origin as determined by alpha- and gamma-tubulin co-staining.  
738 Scale bars, 10µm. **g**, Intensity line scans across the highest gamma-tubulin signal along the  
739 left-right axis (dashed line in **f**). The purple line indicates gamma-tubulin signal intensity. The  
740 black line indicates alpha-tubulin signal distribution. **h**, Frequency of cell rupturing events of  
741 *Lfc*<sup>+/+</sup> (n = 73 cells, N = 3 experiments) and *Lfc*<sup>-/-</sup> (n = 128 cells, N = 3 experiments) DCs while  
742 migrating within single constriction containing microchannels.

743

744 **Supplementary Figure 5. Aberrant spatiotemporal MLC accumulation and moesin**  
745 **localization in  $Lfc^{-/-}$  DCs.** **a**, Time-lapse montage of a MLC-GFP expressing DC migrating under  
746 agarose towards a soluble CCL19 gradient. A cycle of migration, retraction, and pausing is  
747 shown. Scale bar, 10 $\mu$ m. Dotted lines indicate positions further analyzed by Kymograph in **b**.  
748 **b**, Leading edge kymograph was derived from grey dotted line in leading edge region of **a**.  
749 Trailing edge kymograph was derived from purple dotted line in trailing edge region of **a**. Note  
750 the absence of MLC accumulation in leading edge areas and the presence of trailing edge MLC  
751 accumulation during migration. Scale bar, 5 $\mu$ m. **c**, Time-lapse sequence showing  
752 spatiotemporal MLC accumulation of a  $Lfc^{+/+}$  DC and **d**, a  $Lfc^{-/-}$  DC. Purple arrowheads highlight  
753 trailing edge MLC accumulation, orange arrowheads indicate central MLC accumulation. Scale  
754 bars, 10 $\mu$ m. **e**, Quantitative morphometry of Moesin in fixed migratory  $Lfc^{+/+}$  (red) and  $Lfc^{-/-}$   
755 (blue) DCs. Lower panel: Quantification of fluorescence intensity in leading versus trailing  
756 edge regions of  $Lfc^{+/+}$  (red) and  $Lfc^{-/-}$  (blue) DCs of  $n = 55$  cells per condition from  $N = 3$   
757 experiments. Boxes extend from 25<sup>th</sup> to 75<sup>th</sup> percentile. Whiskers span minimum to maximum  
758 values. \*\*\*  $P \leq 0.001$ , \*\*\*\*  $P \leq 0.0001$ . Scale bars, 10 $\mu$ m. **f**, Protein levels of phospho-ERM  
759 in  $Lfc^{+/+}$  and  $Lfc^{-/-}$  DCs assessed by Western Blot analysis. Right panel: Quantification of pERM  
760 levels upon treatment with DMSO, CCL19, nocodazole or Y27632. Mean fluorescence  
761 intensity of pERM signal was normalized to total ERM signal and shown as fold increase  
762 relative to  $Lfc^{+/+}$  DMSO control  $\pm$  S.D. of  $N = 3$  experiments.

763

764 **Supplementary Figure 6. Unprocessed western blot scans.** **a**, Raw image of blot probed  
765 against GEF-H1. Blue boxed region indicates area shown in Supplementary Fig. 5f. **b**, Raw  
766 image of blot probed against phospho-ERM proteins. Blue boxed region indicates area shown  
767 in Supplementary Fig. 5f. **c**, Raw image of blot probed against total ERM protein. Blue boxed  
768 region indicates area shown in Supplementary Fig. 5f. **d**, Raw image of blot probed against  
769 GEF-H1 and phospho-MLC. Blue boxed regions indicate areas shown in Supplementary Fig. 4c.  
770 **e**, Raw image of blot probed against GAPDH. Blue boxed region indicates area shown in Fig.  
771 Supplementary 4c. **f**, Raw image of blot probed against phospho-MLC. Blue boxed regions  
772 indicate areas shown in Supplementary Fig. 2i. **g**, Raw image of blot probed against GAPDH.  
773 Blue boxed region indicates area shown in Supplementary Fig. 2i.

774

775 **Supplementary Movie Legends**

776 **Supplementary Movie 1. MT dynamics during path finding within a pillar array.** An EB3-  
777 mCherry expressing reporter cell was acquired while migrating within a complex 3D pillar  
778 array towards a soluble CCL19 gradient in 2sec intervals on an inverted spinning disc  
779 microscope. Scale bar, 10 $\mu$ m.

780

781 **Supplementary Movie 2. Polarized MT dynamics in migratory DCs.** DC is expressing EMTB-  
782 mCherry. Migration during 2D confinement under agarose was acquired in 2sec intervals  
783 using a TIRF setup. For representation, the signal was inverted after the acquisition. The upper  
784 panel shows the protruding leading edge, in which grey arrowheads indicate elongating MT  
785 filaments. The lower panel shows retracting trailing edge of the same cell in which purple  
786 arrowheads highlight MT shrinking events. Time in [min:sec]. Scale bar, 5 $\mu$ m.

787

788 **Supplementary Movie 3. Induced MT depolymerization locally activates the contractile**  
789 **module.** TAMRA stained DCs migrating under agarose were recorded every 2sec on an  
790 inverted spinning disc microscope and locally photo-activated (red box) every 40sec using a  
791 405nm laser line. Cells were either untreated (upper panel) or treated with PST-1 (lower  
792 panel). Time in [min:sec]. Scale bar 10 $\mu$ m.

793

794 **Supplementary Movie 4. MTs promote cell coherence during migration in complex**  
795 **environments.** DCs were either non-treated (control) or treated with the indicated  
796 compounds (nocodazole or double treatment using Y27632 together with nocodazole) and  
797 recorded while migrating within a path choice assay towards a soluble CCL19 gradient in  
798 60sec intervals. Note that under all conditions cells insert multiple protrusions into different  
799 channels when reaching the junction point (black arrowheads). Red arrowheads highlight  
800 rupturing events and loss of cellular coherence only observed in drug-treated cells. Time in  
801 [min:sec]. Scale bar, 10 $\mu$ m.

802

803 **Supplementary Movie 5. Perturbation of MT and myosin dynamics impairs DC migration in**  
804 **complex scaffolds.** Mature DCs migrating along a soluble CCL19 gradient within a 3D collagen  
805 matrix. Shown are separately acquired bright field movies of control- (DMSO), nocodazole-  
806 treated and double-treated cells using Y27632 and nocodazole (Y/N) reconstructed in a single

807 file. Images were acquired every 60sec for 5h and are represented as single movie in 4min  
808 intervals. Time in [min:sec]. Scale bar, 100 $\mu$ m for representative movie of bulk cell movement,  
809 scale bar, 10 $\mu$ m for movie showing single cell dynamics.

810

811 **Supplementary Movie 6. Perturbation of MT and myosin dynamics permits DC migration**  
812 **within simple linear microenvironments.** Mature DCs migrating along a soluble CCL19  
813 gradient within a straight microchannel. Shown are separately acquired bright field movies of  
814 non-treated, nocodazole-treated and double-treated cells using Y27632 and nocodazole cells  
815 reconstructed in a single file. Images were acquired in 20sec intervals for 5h. Note the  
816 frequent directional oscillations of nocodazole only treated cells. Time in [min:sec]. Scale bar,  
817 10 $\mu$ m.

818

819 **Supplementary Movie 7. Microtubules mediate retraction of supernumerary protrusions**  
820 **via Lfc.** Lfc<sup>+/+</sup> and Lfc<sup>-/-</sup> DCs were recorded while migrating within a path choice assay towards  
821 a soluble CCL19 gradient in 30sec intervals. Note that both genotypes insert multiple  
822 protrusions into different channels when reaching the junction point (black arrowheads). Red  
823 arrowheads highlight rupturing events and loss of cellular coherence only observed in Lfc-  
824 deficient cells. Time in [min:sec]. Scale bar, 10 $\mu$ m.

825

826 **Supplementary Movie 8. Lfc specifies myosin localization at the trailing edge.** Combined  
827 movies of MLC-GFP expressing Lfc<sup>+/+</sup> DCs (left panel) and Lfc<sup>-/-</sup> DCs (right panel) migrating  
828 under agarose along a soluble CCL19 gradient, acquired in 2sec intervals on an inverted  
829 spinning disc microscope. Magenta arrowhead indicates trailing edge MLC accumulation,  
830 which is absent in Lfc<sup>-/-</sup> cells. Orange arrowhead highlights central MLC accumulation.  
831 Fluorescence signal was inverted for better visualization. Time in [min:sec]. Scale bar 10 $\mu$ m.

832

833 **Supplementary Movie 9. Lfc promotes DC migration within complex environments.** Mature  
834 DCs generated from Lfc<sup>+/+</sup> and Lfc<sup>-/-</sup> mice were embedded in a 3D collagen matrix. Migration  
835 along a soluble CCL19 gradient was acquired for 5h in 1min intervals. Images for each  
836 condition were subsequently reconstructed as a single file in 4min intervals. Time in [min:sec].

837

838 **Supplementary movie 10. Lfc regulates MT-mediated adhesion resolution.** Nocodazole-  
839 treated  $Lfc^{+/+}$  and  $Lfc^{-/-}$  DCs were acquired while migrating under agarose towards a soluble  
840 CCL19 gradient in 20 second intervals on an inverted cell culture microscope. Left panels show  
841 nocodazole-treated cells during adhesive migration. Note the loss of directionality in  $Lfc^{+/+}$   
842 DCs and the pronounced elongation of  $Lfc^{-/-}$  DCs. Right panels show nocodazole effects during  
843 adhesion-independent migration on PEG coated coverslips. Note the persistent loss of  
844 directionality in  $Lfc^{+/+}$  DCs but the restored cell lengths of  $Lfc^{-/-}$  DCs. Time in [min:sec]. Scale  
845 bar 100 $\mu$ m.

## Microtubules control cellular shape and coherence in amoeboid migrating cells

**Figure 1 - The microtubule organizing center acts as pathfinder by coordinating protrusion dynamics**

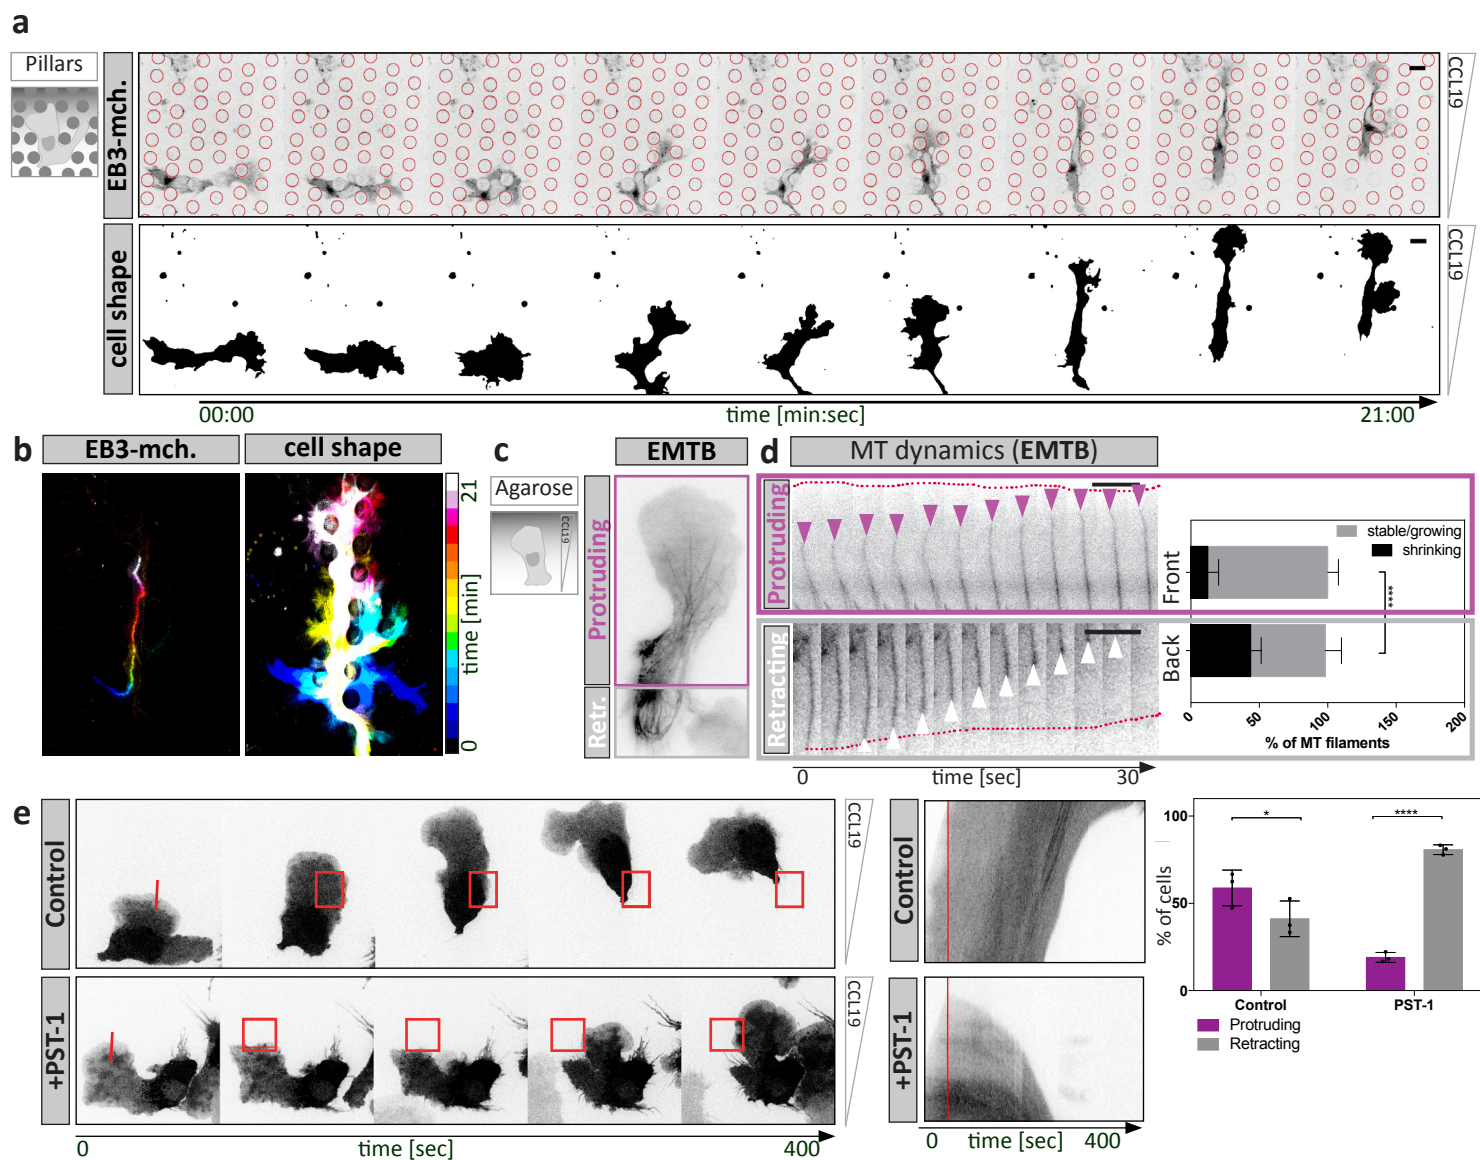

## Microtubules control cellular shape and coherence in amoeboid migrating cells

**Figure 2 - Microtubules coordinate protrusion dynamics via the contractile module**

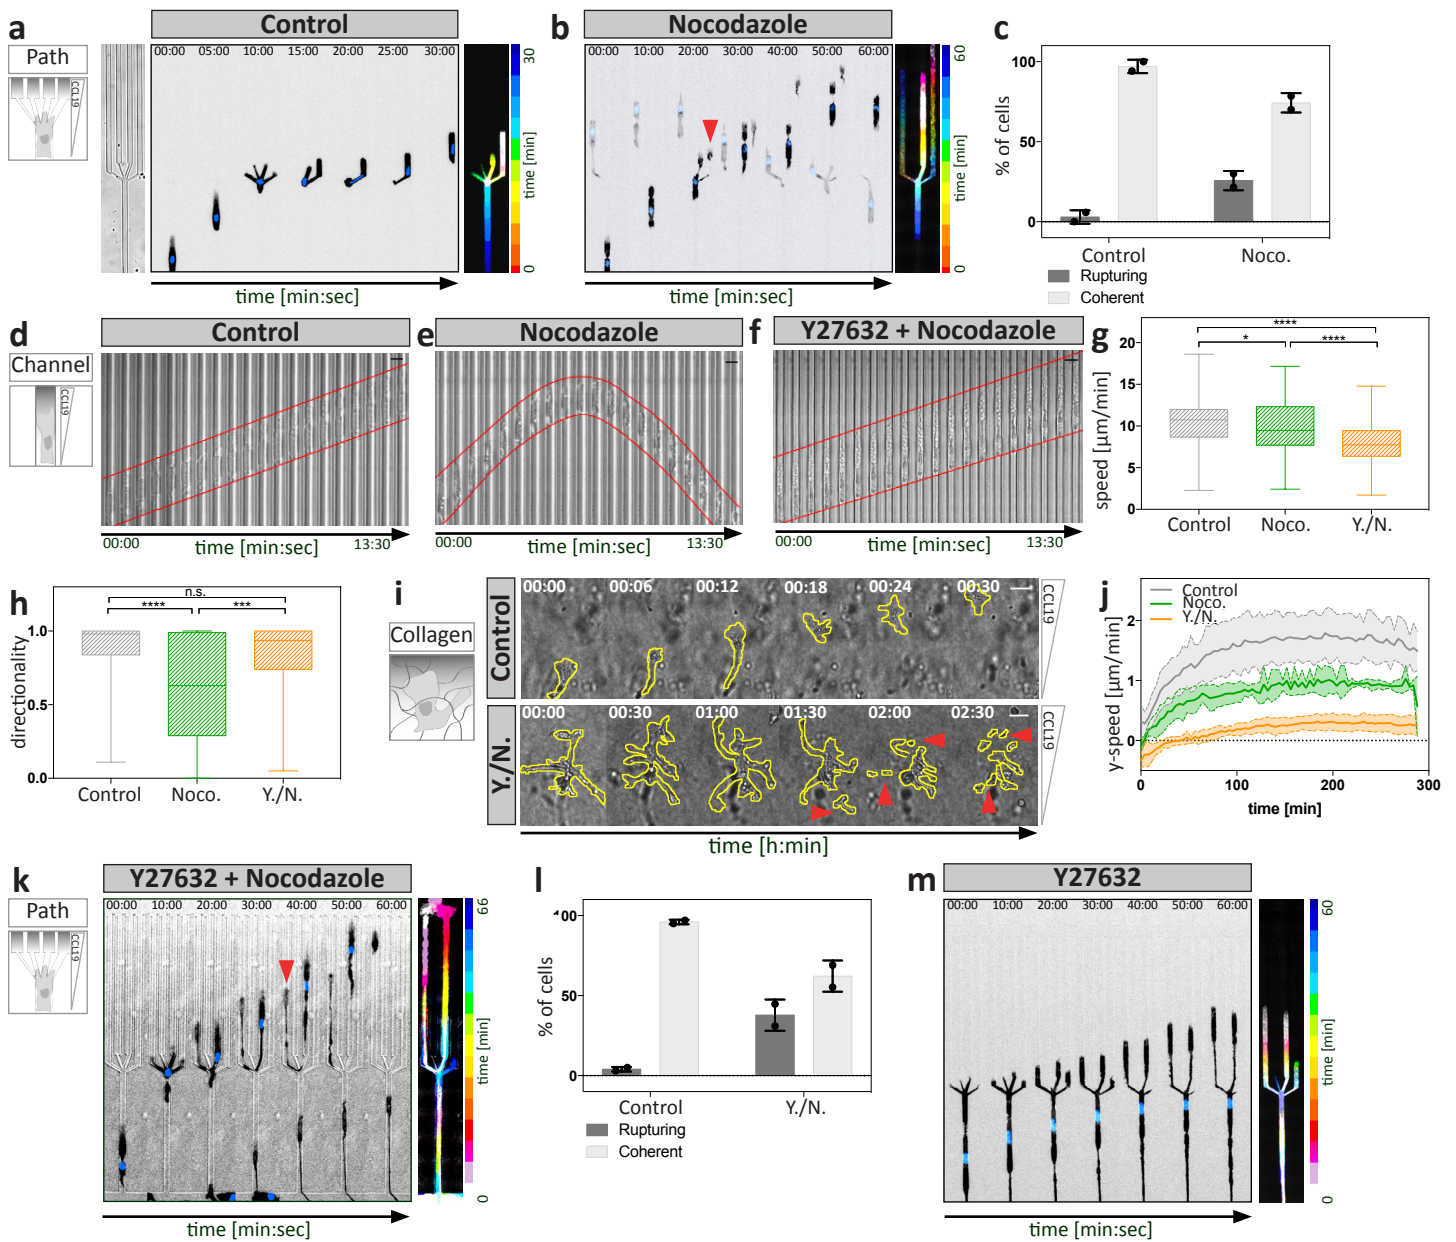



## Microtubules control cellular shape and coherence in amoeboid migrating cells

**Figure 3 - Microtubules mediate retraction of supernumerary protrusions via Lfc**

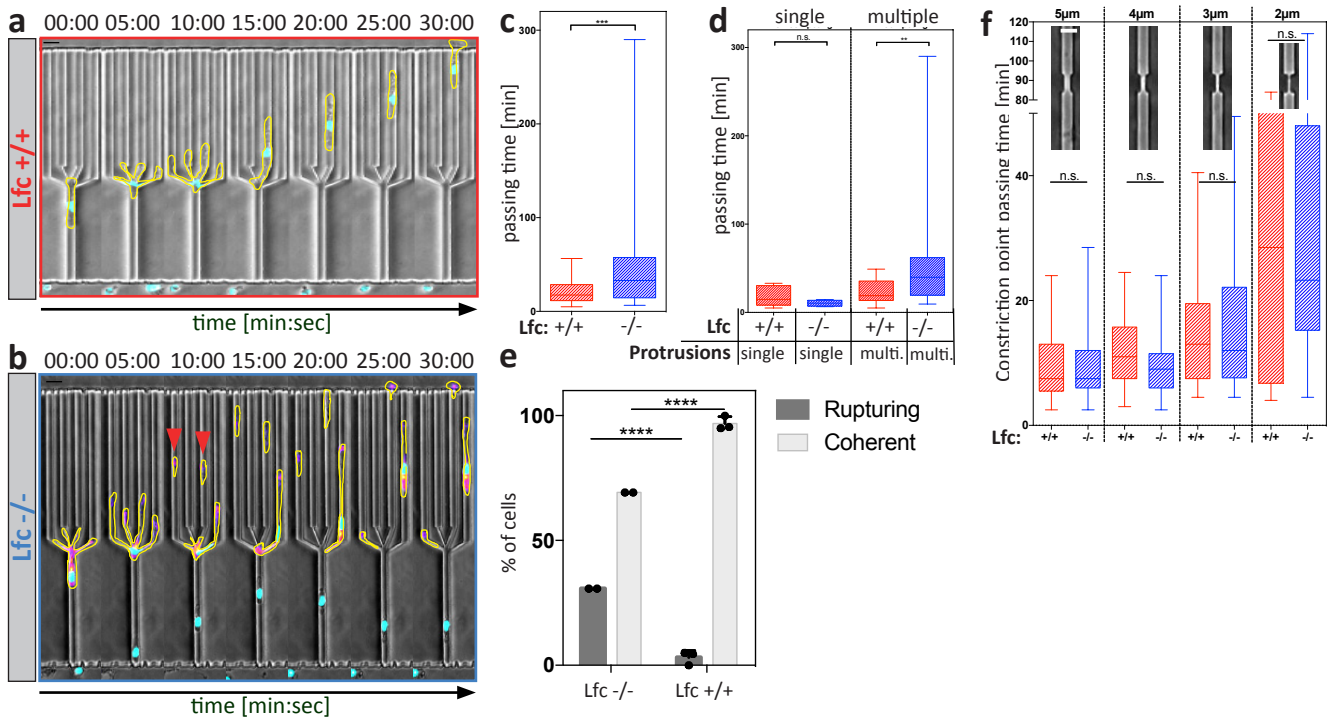

## Microtubules control cellular shape and coherence in amoeboid migrating cells

**Figure 4 - Lfc-dependent myosin accumulation controls cellular locomotion**

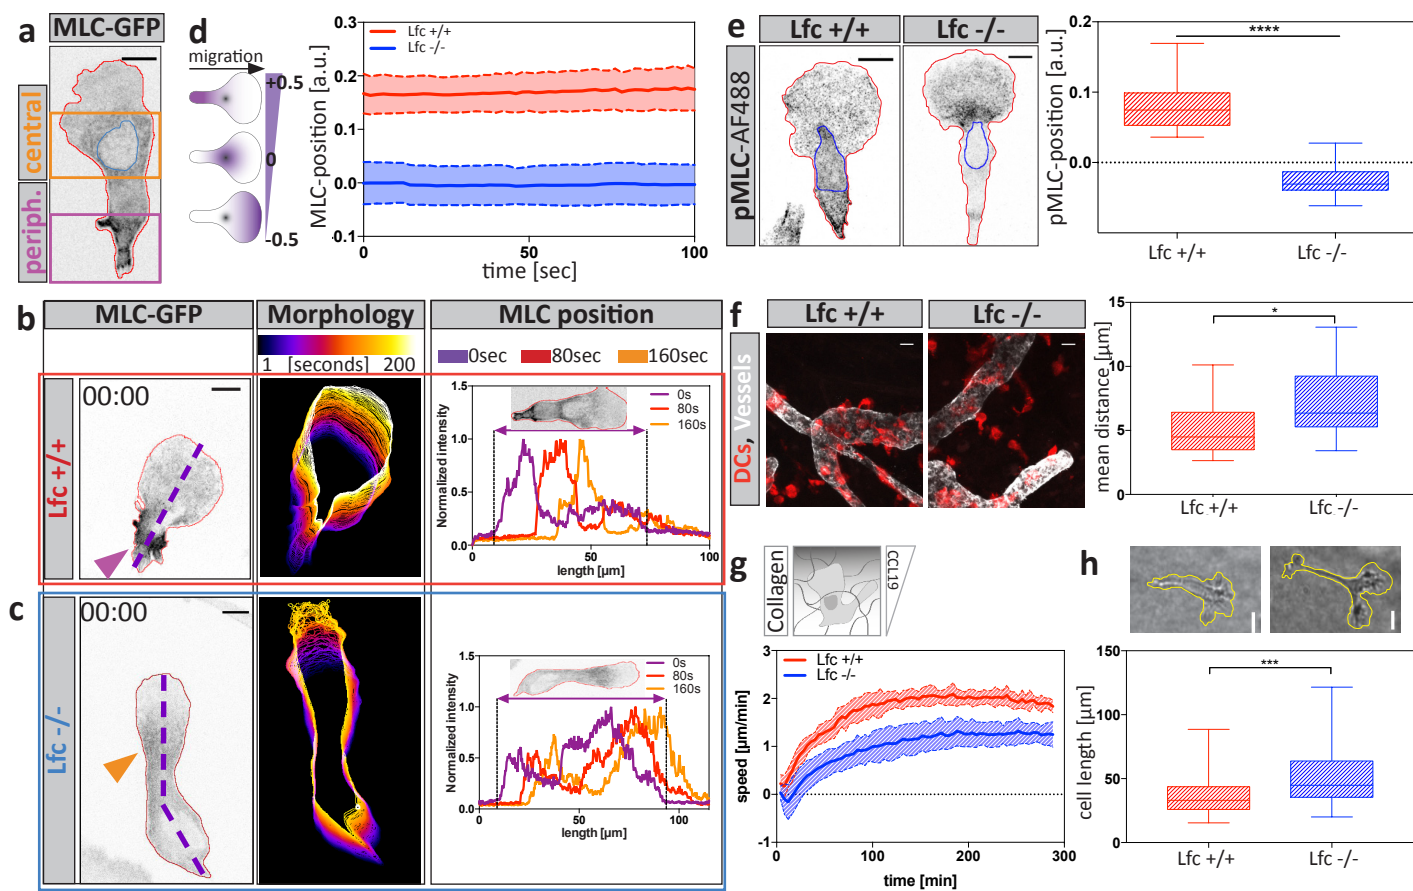

## Microtubules control cellular shape and coherence in amoeboid migrating cells

**Figure 5 - Lfc regulates microtubule-mediated adhesion resolution**

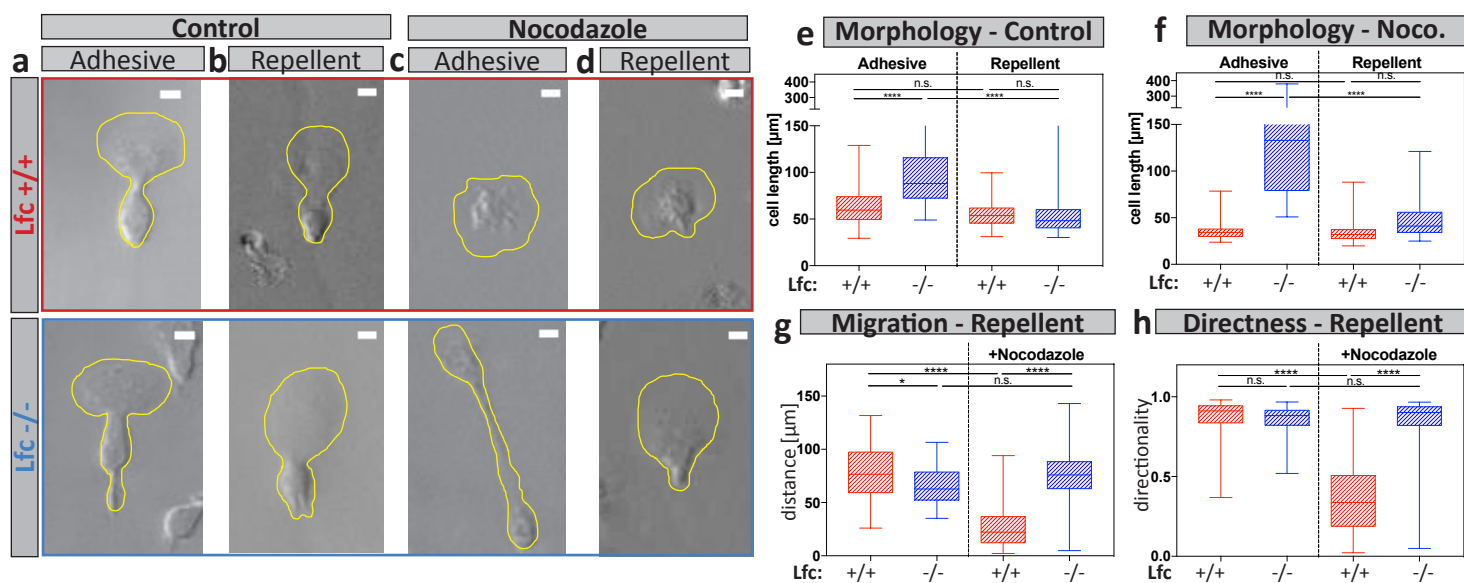

## Microtubules control cellular shape and coherence in amoeboid migrating cells

### Supplementary Figure 1 - DC migration within diverse matrices to study the role of the MT cytoskeleton during amoeboid migration.

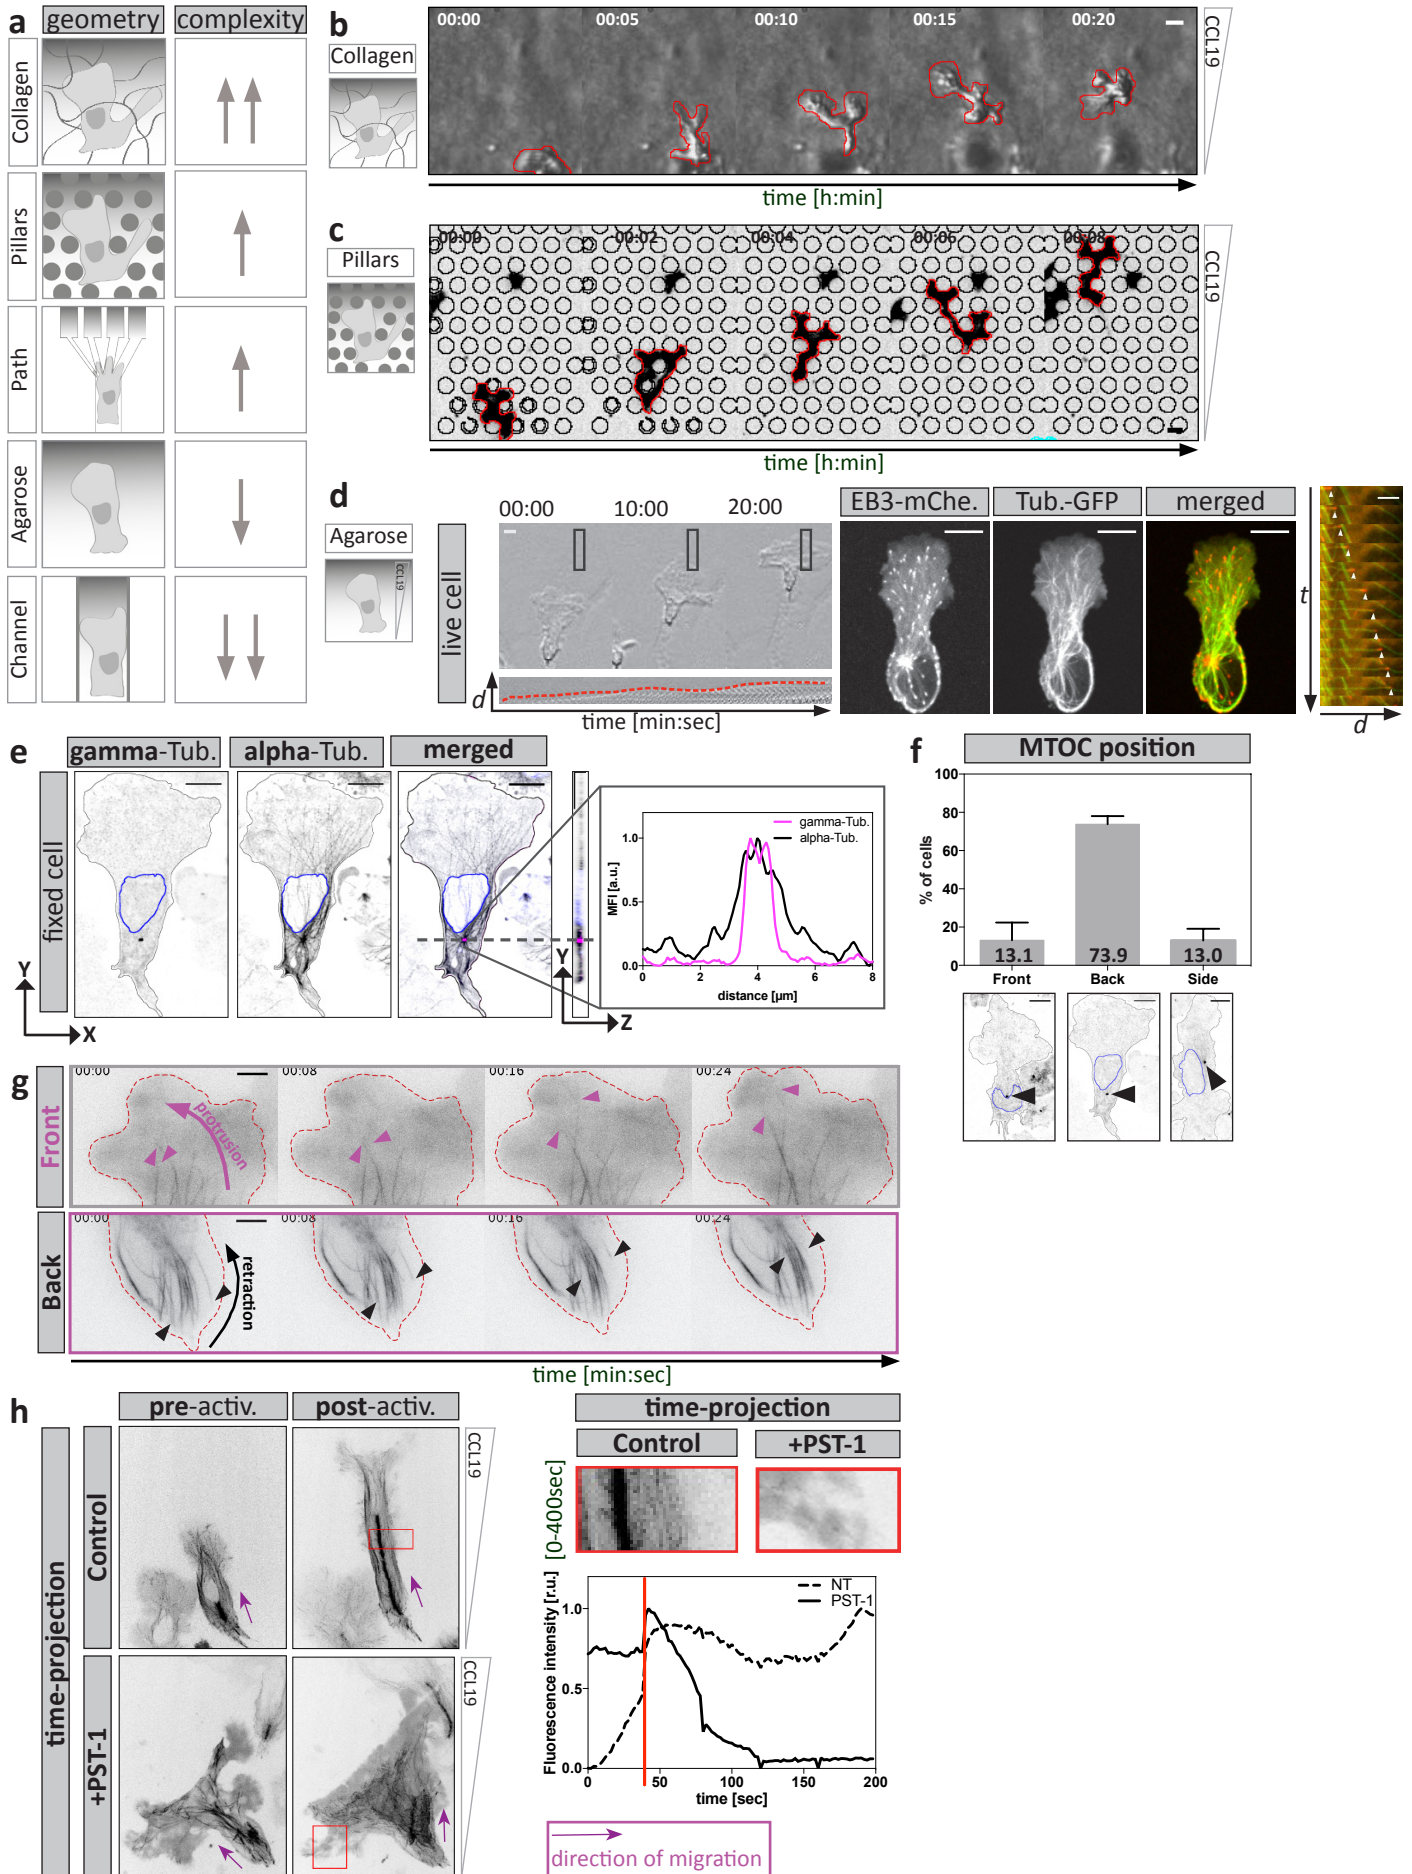

## Microtubules control cellular shape and coherence in amoeboid migrating cells

### Supplementary Figure 2 - Perturbation of the MT cytoskeleton affects DC migration on multiple levels.

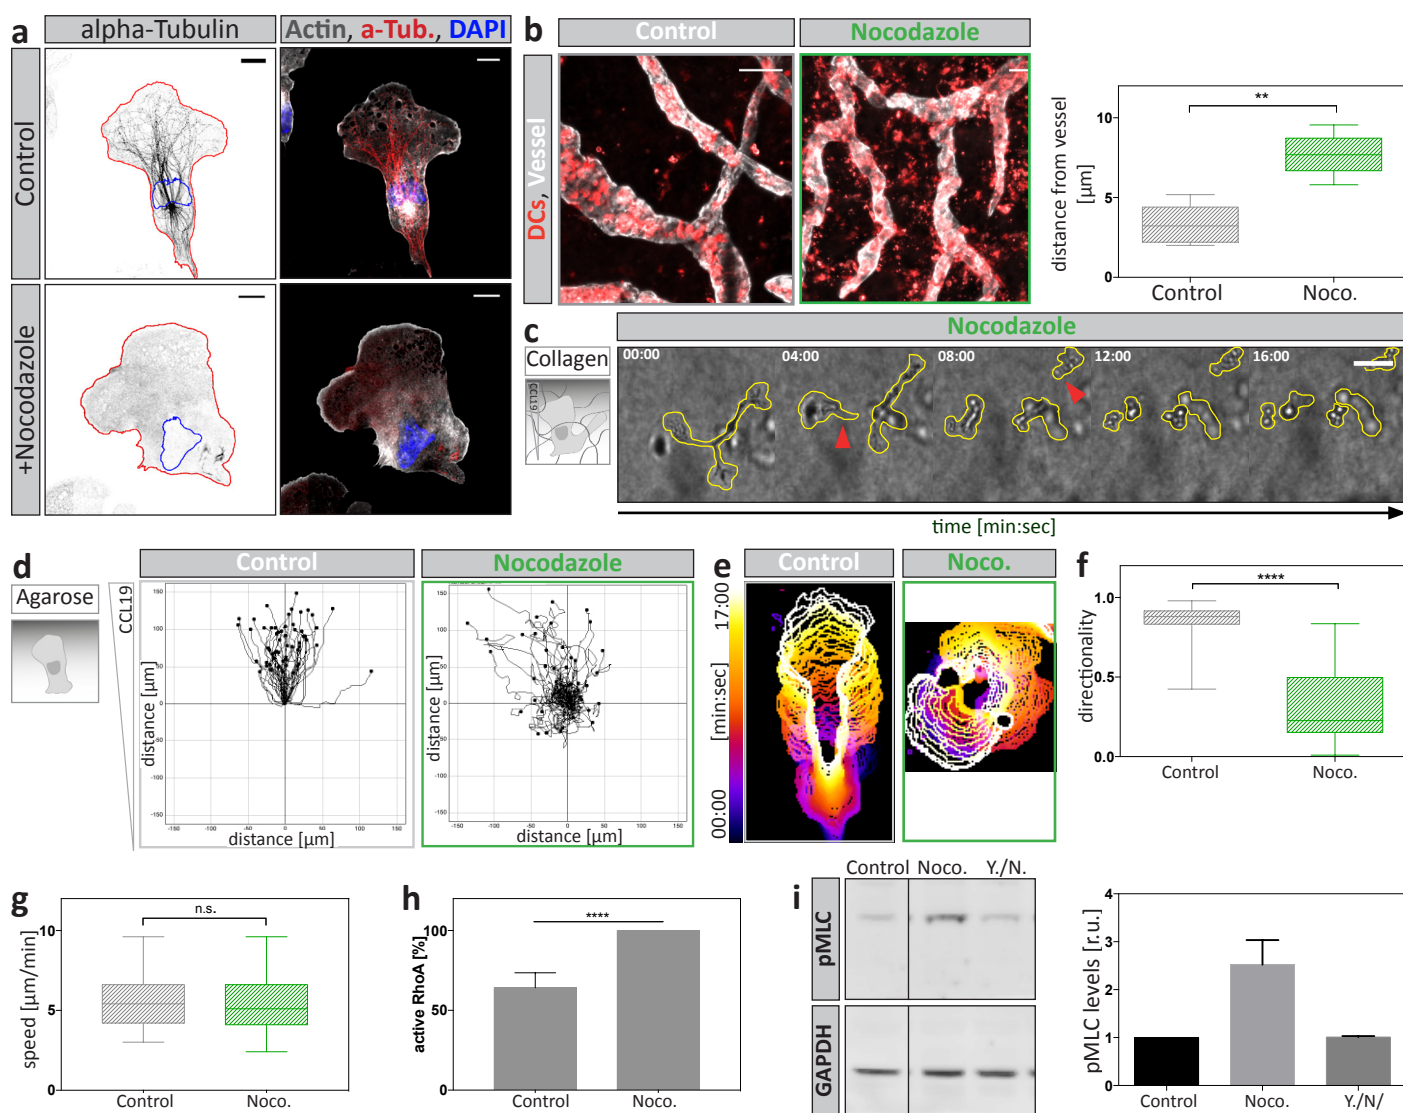

## Microtubules control cellular shape and coherence in amoeboid migrating cells

### Supplementary Figure 3 - Generation of a *Lfc*-deficient mouse line.

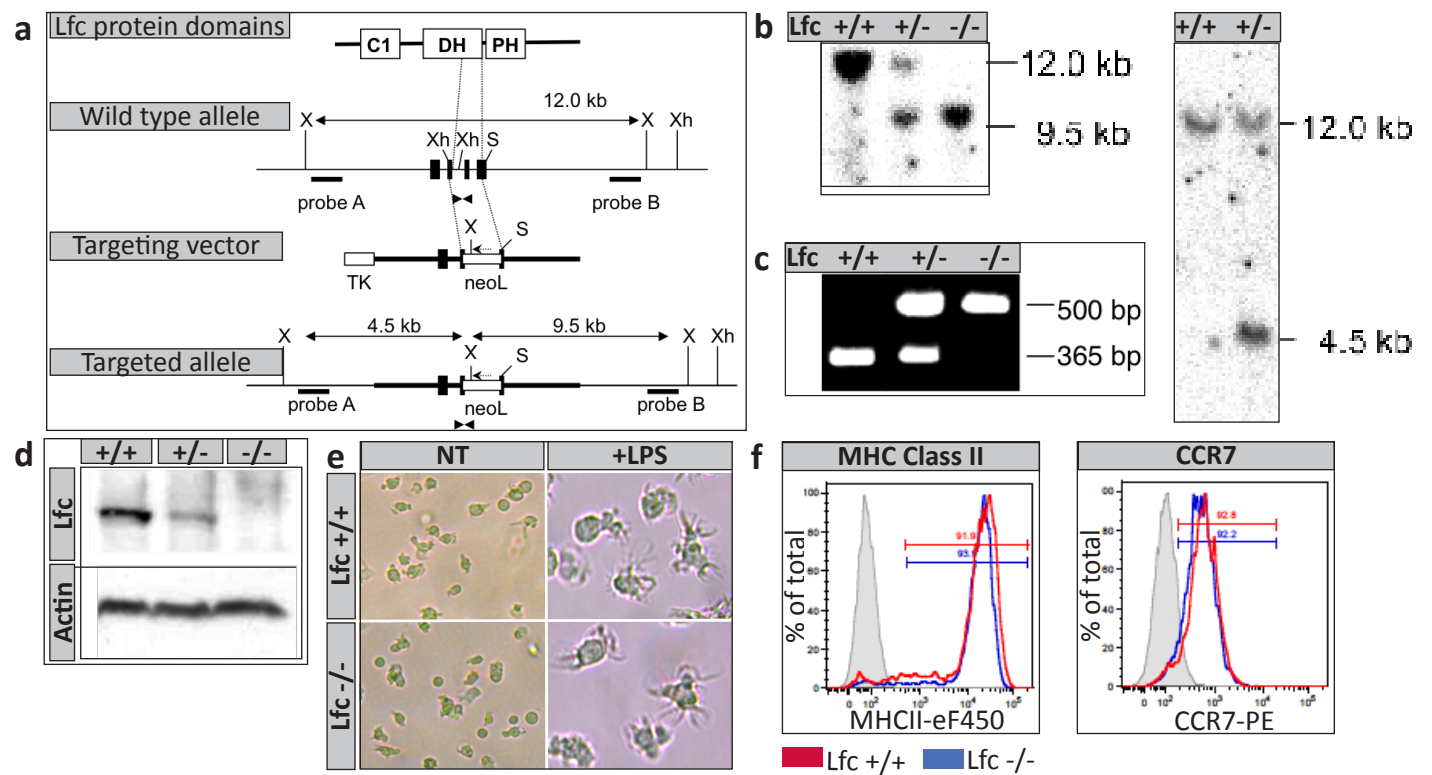

## Microtubules control cellular shape and coherence in amoeboid migrating cells

### Supplementary Figure 4 - Lfc-deficient DCs exhibit reduced contractile responses.

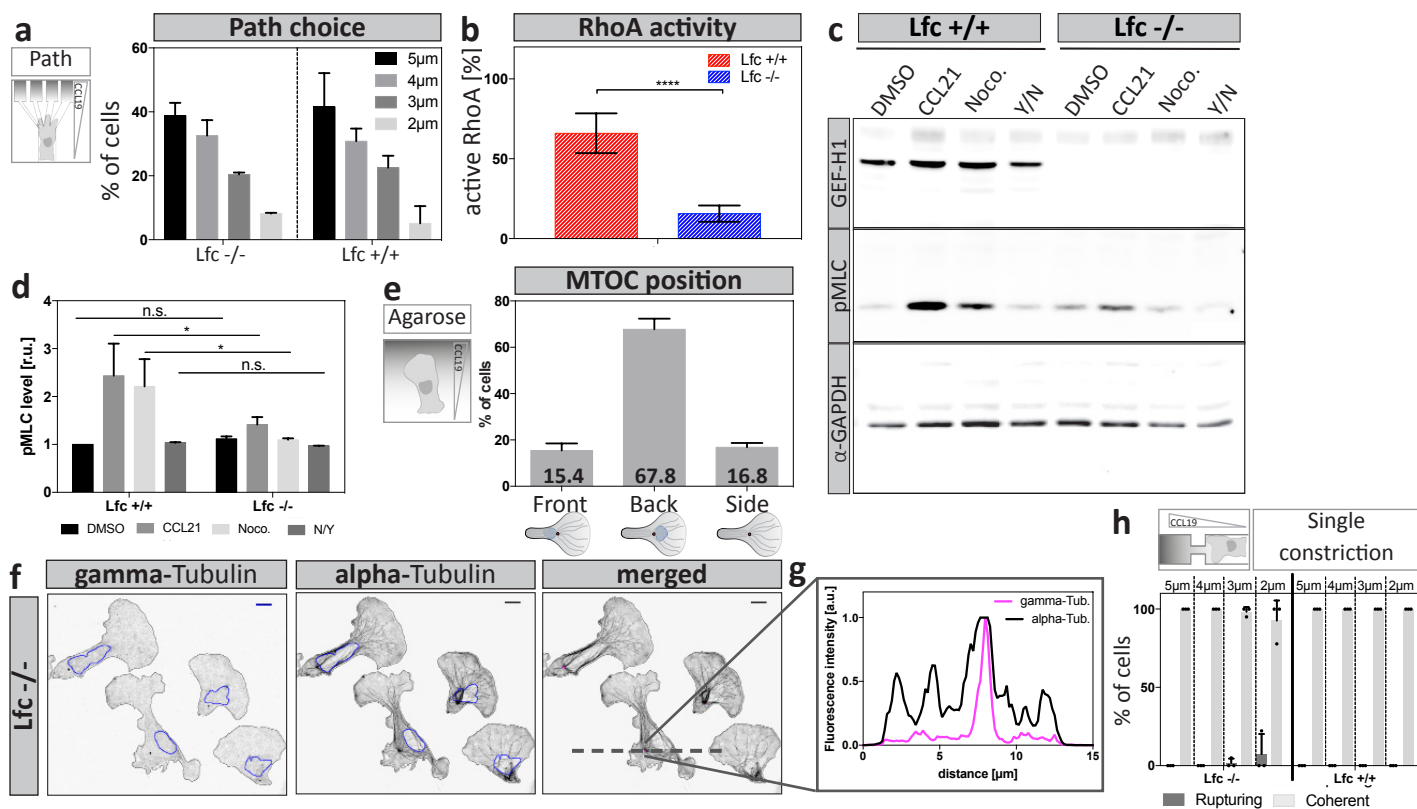

## Microtubules control cellular shape and coherence in amoeboid migrating cells

### Supplementary Figure 5 - Aberrant spatiotemporal MLC accumulation and moesin localization in *Lfc*-deficient DCs.

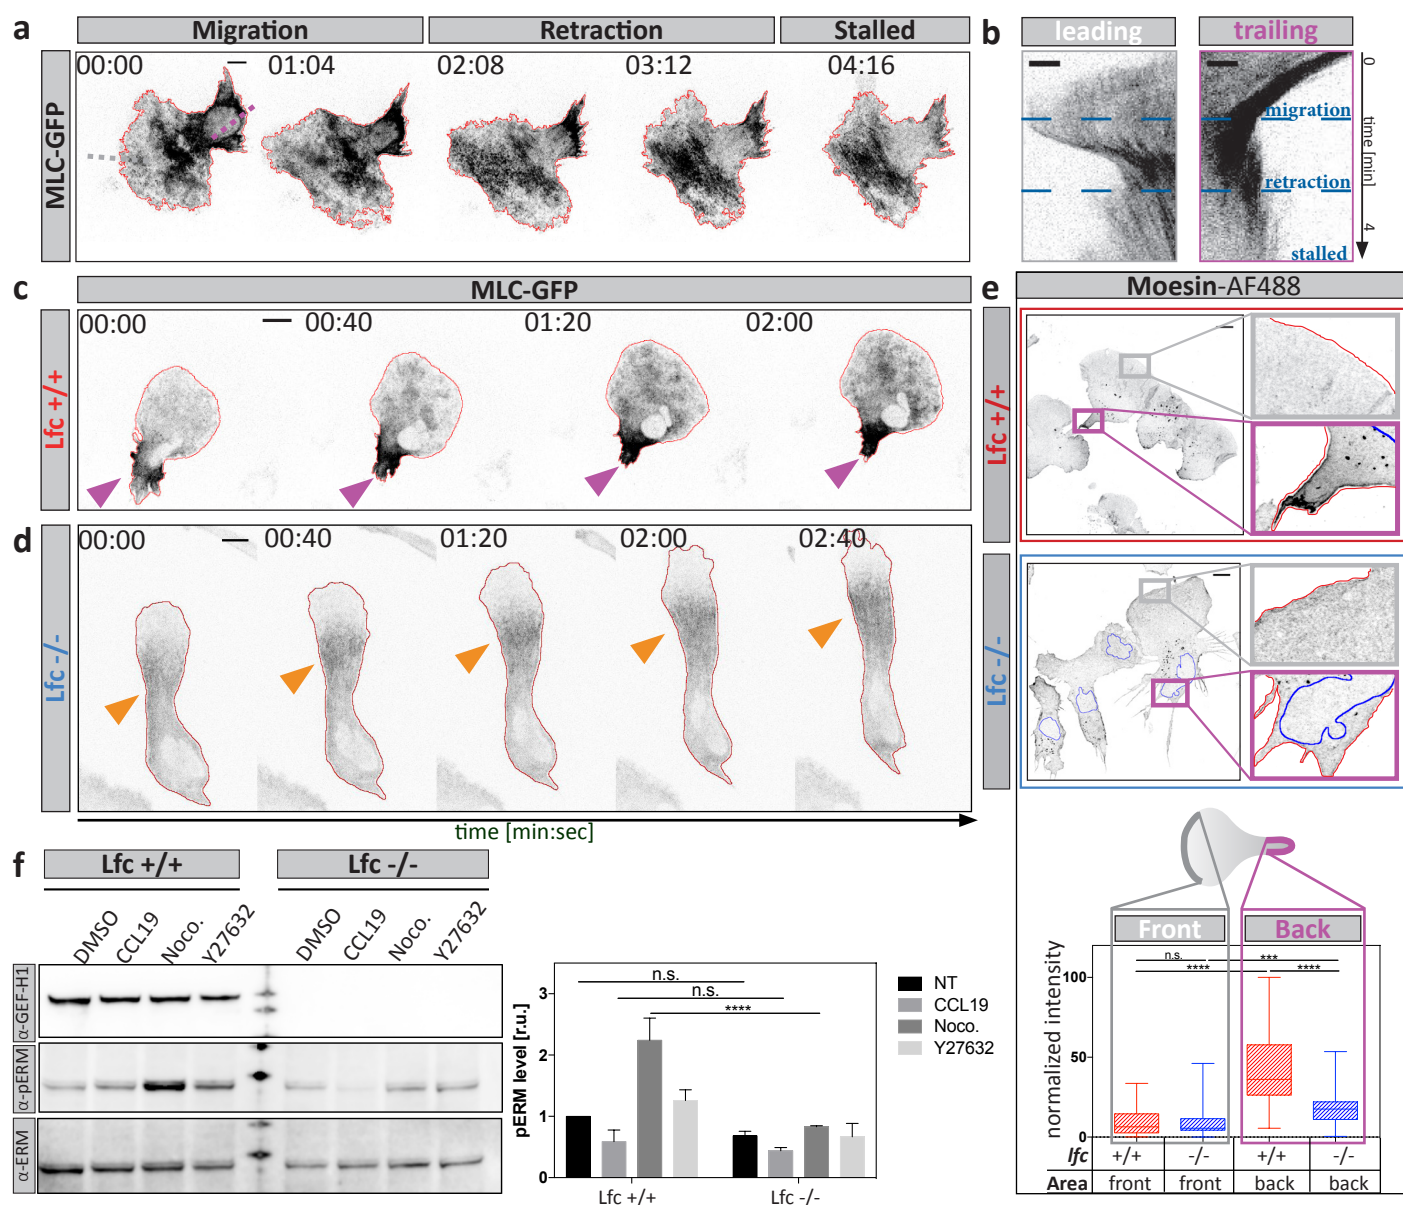



## Microtubules control cellular shape and coherence in amoeboid migrating cells

### Supplementary Figure 6 - Unprocessed western blot scans.

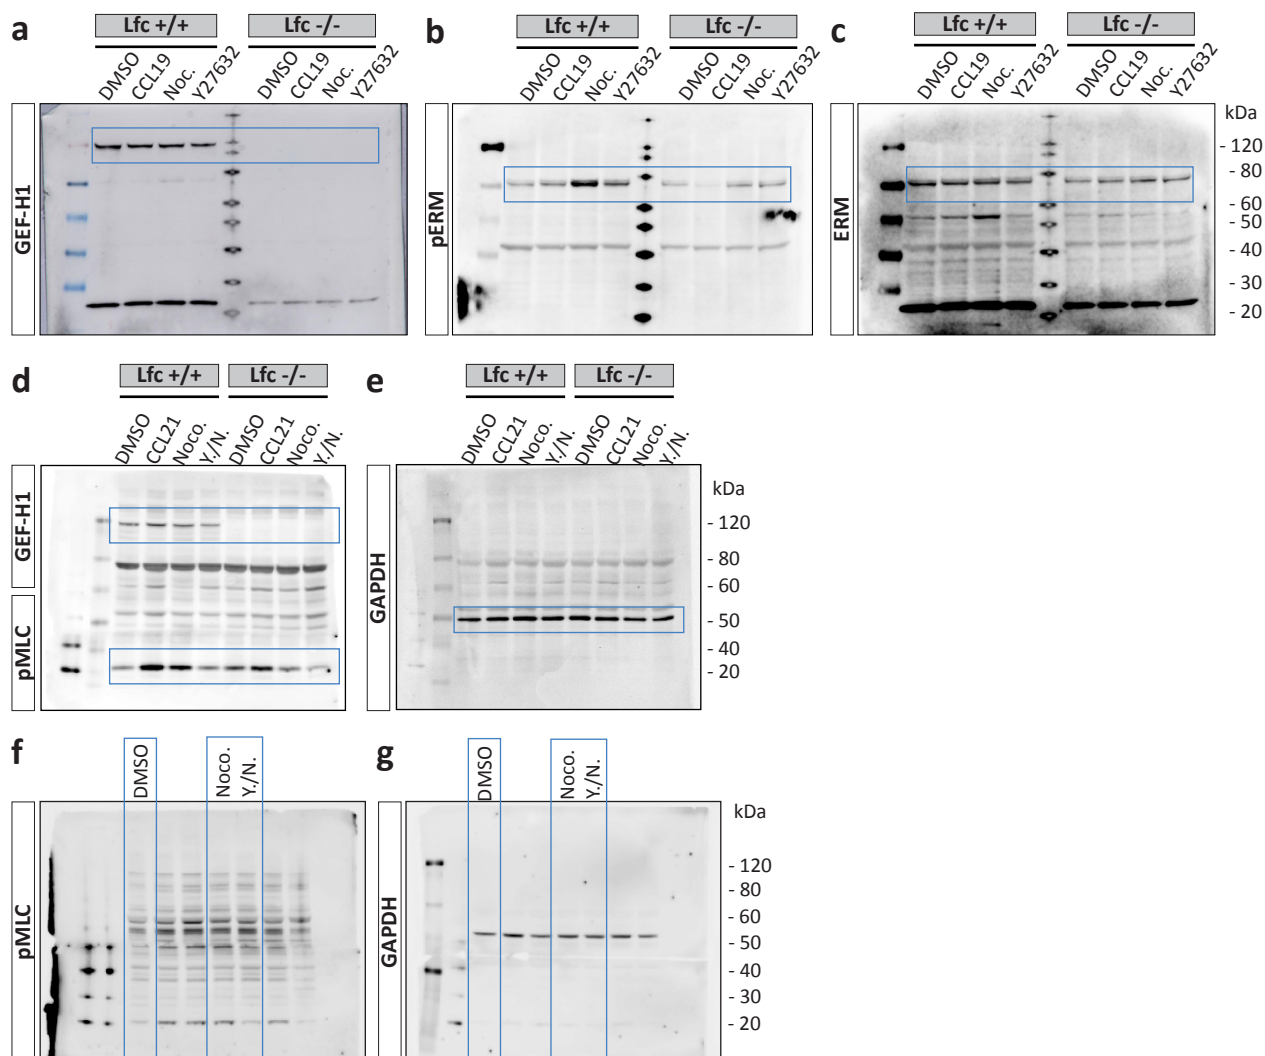

Source: https://www.biorxiv.org/content/10.1101/609420v2.full.pdf
